# Supplementary material for: Nickel-catalyzed α-benzylation of sulfones with esters via C–O activation
Source: Royal Society of Chemistry journal article supplement (doi:10.1039/c6ra07130a), 2016-01-01
Supplement: c6ra07130a1.pdf [file c6ra07130a1.pdf]

## Supporting Information

### Nickel-Catalyzed $\alpha$ -Benzylation of Sulfones with Esters via C-O Activation

Jing Xiao, Jia Yang, Tieqiao Chen\* and Li-Biao Han\*

*State Key Laboratory of Chemo/Biosensing and Chemometrics, College of Chemistry and Chemical Engineering, Hunan University, Changsha, 410082, China*

Email: [chentieqiao@hnu.edu.cn](mailto:chentieqiao@hnu.edu.cn)

|                                                                    |         |
|--------------------------------------------------------------------|---------|
| 1. General information.....                                        | S2      |
| 2. Preparation of substrates.....                                  | S3-S4   |
| 3. General procedure and spectral data for the products.....       | S4-S11  |
| 4. References.....                                                 | S12     |
| 5. Copies of $^1\text{H}$ NMR and $^{13}\text{C}$ NMR spectra..... | S13-S37 |

---

## 1. General information

Unless otherwise noted, all reagents were purchased from commercial suppliers and used without purification. All solvents were dried by standard methods. Ni(COD)<sub>2</sub> and phosphine ligands are stored under nitrogen in the glove box. Unless otherwise noted, all coupling reactions were performed in 10-mL glass vessel tubes. Unless otherwise noted, all reactions were carried out under N<sub>2</sub> atmosphere.

Flash column chromatography was performed using 200-300 mesh silica gel. Visualization on TLC was achieved by the use of UV light (254 nm). All reactions were monitored by GC, GC-MS. <sup>1</sup>H NMR and <sup>13</sup>C NMR spectra were measured on a Bruker Avance III-400 spectrometer. (<sup>1</sup>H 400 MHz, <sup>13</sup>C 101 MHz), using CDCl<sub>3</sub> as the solvent with tetramethylsilane (TMS) as the internal standard. Chemical shifts are reported in ppm and referenced to residual solvent peaks (CHCl<sub>3</sub> in CDCl<sub>3</sub>: 7.26 ppm for <sup>1</sup>H and 77.0 ppm for <sup>13</sup>C). The coupling constants J are given in Hz. Mass spectra were recorded by GCMS-QP2010 ultra spectrometer. The high-resolution mass spectrum (HRMS) was recorded on MAT 95 XP instrument. The GC yields were accorded to the authentic samples/tridecane calibration standard from Shimadzu GC-2010 plus equipped with FID system.

## 2. Preparation of substrates

Substrates **1a**, **1n**, **1o**, **1p**, **1q**, **1r**, **1s**, **2t**, **2u**, and **2v** were prepared according to the literature procedure.<sup>1</sup> Substrates **2h**, **2i**, **2j**, **2k** were prepared according to the reported literatures.<sup>2</sup> Substrates **2f** was prepared via methylation of the corresponding sulfones.<sup>3</sup>

### Preparation of deuterated pentafluorobenzene<sup>6</sup>

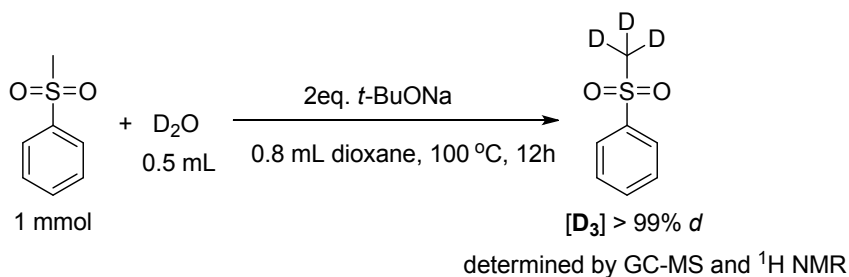

### Preparation of **1l**

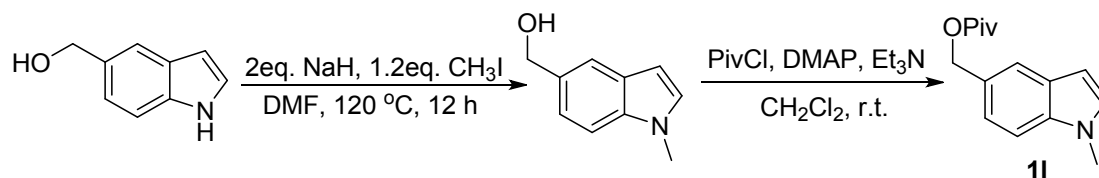

To a solution of indole-5-methanol (2.94 g, 20 mmol) and NaH (40 mmol) in DMF (40 mL) was added  $CH_3I$  (1.2 equiv) at room temperature. After stirring for 12h at 120 °C, the reaction mixture was quenched with saturated  $NaHCO_3$  (10 mL), then the layers were separated. The aqueous layer was extracted with  $CH_2Cl_2$  (25 mL  $\times$  3) and the combined organic layer was dried over  $Na_2SO_4$  and then filtrated. After evaporation of the solvent under reduced pressure, the crude residue was purified by flash column chromatography to afford the methylated product (1-methyl-1H-indol-5-yl)methanol. To a solution of (1-methyl-1H-indol-5-yl)methanol and 4,4-dimethylaminopyridine (DMAP, 10 mol%) in  $CH_2Cl_2$  (30 mL) was added triethylamine (1.2 equiv) at room temperature. Then pivaloyl chloride (1.2 equiv) was added dropwise over 3 min at 0 °C. After stirring for 15 min, the reaction mixture was quenched with saturated  $NaHCO_3$  (10 mL), then the layers were separated. The aqueous layer was extracted with  $CH_2Cl_2$  (25 mL  $\times$  3) and the combined organic layer was dried over  $Na_2SO_4$  and then filtrated. After evaporation of the solvent under reduced pressure, the crude residue was purified by flash column chromatography (Petroleum ether/EtOAc = 10:1) to afford the product **1l**.

### Representative procedure

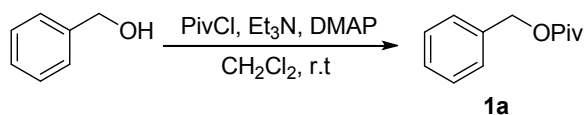

To a solution of phenylmethanol (2.16 g, 20 mmol) and 4,4-dimethylaminopyridine (DMAP, 10 mol%) in CH<sub>2</sub>Cl<sub>2</sub> (30 mL) was added triethylamine (3.35 mL, 24 mmol, 1.2 equiv) at room temperature. Then pivaloyl chloride (2.95 mL, 24 mmol, 1.2 equiv) was added dropwise over 3 min at 0 °C. After stirring for 15 min, the reaction mixture was quenched with saturated NaHCO<sub>3</sub> (10 mL), then the layers were separated. The aqueous layer was extracted with CH<sub>2</sub>Cl<sub>2</sub> (25 mL × 3) and the combined organic layer was dried over Na<sub>2</sub>SO<sub>4</sub> and then filtrated. After evaporation of the solvent under reduced pressure, the crude residue was purified by flash column chromatography (Petroleum ether/EtOAc = 10:1) to afford the product **1a** in 90% yield.

### 3. General procedure and spectral data for the products

#### A. Typical procedure of Ni-catalyzed cross coupling of benzylic pivalate with methyl phenyl sulfone

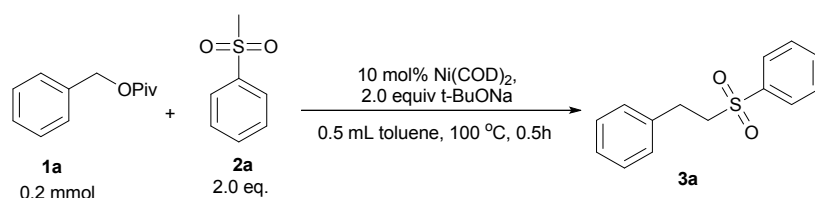

In a nitrogen-filled glove box, a 10 mL sealed schlenk tube equipped with a magnetic stir bar was charged with **1a** (0.2 mmol), Ni(COD)<sub>2</sub> (0.02 mmol), *t*-BuONa (0.4 mmol) and (methylsulfonyl)benzene (0.4 mmol) and toluene (0.5 mL). The reaction mixture was stirred at 100 °C for 0.5 hours. After cooling the reaction mixture to room temperature, the mixture was passed through a short silica gel column with EtOAc. The filtrate was concentrated and the residue was further purified by column chromatography on silica gel to give the product **3a** in 71% yield.

#### B. Spectral data for products (0.2 mmol scale)

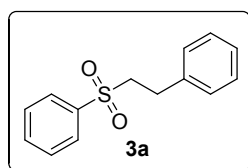

**(Phenethylsulfonyl)benzene**, yield for pivalate 71%, 34.9 mg; yield for carbonate 63%, 31.0 mg; <sup>1</sup>H NMR (400 MHz CDCl<sub>3</sub>): δ 7.94 (d, *J* = 7.6 Hz, 2H), 7.66 (t, *J* = 7.6 Hz, 1H), 7.57 (t, *J* = 7.6 Hz, 2H), 7.27–7.17 (m, 3H), 7.10 (d, *J* = 7.2 Hz, 2H), 3.38–3.34 (m, 2H), 3.06–3.02 (m, 2H). <sup>13</sup>C NMR (100 MHz CDCl<sub>3</sub>): δ 139.03, 137.47, 133.85, 129.40, 128.84, 128.31, 128.10, 126.95, 57.53, 28.75. This compound is known.<sup>4</sup>

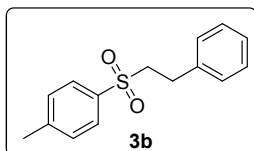

**1-Methyl-4-(phenethylsulfonyl)benzene**, yield 74%, 38.5 mg;  $^1\text{H}$  NMR (400 MHz  $\text{CDCl}_3$ ):  $\delta$  7.81 (d,  $J = 8.0$  Hz, 2H), 7.36 (d,  $J = 8.0$  Hz, 2H), 7.28–7.20 (m, 3H), 7.11 (d,  $J = 7.6$  Hz, 2H), 3.36–3.32 (m, 2H), 3.05–3.01 (m, 2H), 2.46 (s, 3H).  $^{13}\text{C}$  NMR (100 MHz  $\text{CDCl}_3$ ):  $\delta$  144.82, 137.58, 136.06, 129.99, 128.81, 128.30, 128.13, 126.89, 57.64, 28.84, 21.66. This compound is known.<sup>5</sup>

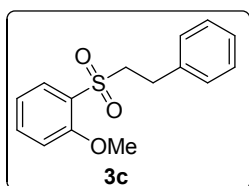

**1-Methoxy-2-(phenethylsulfonyl)benzene**, light yellow oil, yield 61%, 33.7 mg;  $^1\text{H}$  NMR (400 MHz  $\text{CDCl}_3$ ):  $\delta$  7.99–7.96 (m, 1H), 7.60–7.55 (m, 1H), 7.26–7.22 (m, 3H), 7.12–7.08 (m, 3H), 6.99 (d,  $J = 8.4$  Hz, 1H), 3.92 (s, 3H), 3.66–3.62 (m, 2H), 3.04–3.00 (m, 2H).  $^{13}\text{C}$  NMR (100 MHz  $\text{CDCl}_3$ ):  $\delta$  157.32, 137.89, 135.67, 130.60, 128.69, 128.35, 126.76, 120.82, 112.29, 56.28, 55.58, 28.65. HRMS Calcd. for  $\text{C}_{15}\text{H}_{16}\text{O}_3\text{S}$  ( $\text{M}^+$ ) 276.0820, found 276.0802.

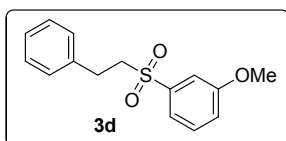

**1-Methoxy-3-(phenethylsulfonyl)benzene**, light yellow oil, yield 77%, 42.5 mg;  $^1\text{H}$  NMR (400 MHz  $\text{CDCl}_3$ ):  $\delta$  7.52–7.42 (m, 3H), 7.28–7.16 (m, 4H), 7.11 (d,  $J = 7.2$  Hz, 2H), 3.86 (s, 3H), 3.38–3.34 (m, 2H), 3.07–3.02 (m, 2H).  $^{13}\text{C}$  NMR (100 MHz  $\text{CDCl}_3$ ):  $\delta$  160.12, 140.19, 137.48, 130.49, 128.82, 128.31, 126.94, 120.26, 120.20, 112.58, 57.47, 55.75, 28.75. HRMS Calcd. for  $\text{C}_{15}\text{H}_{16}\text{O}_3\text{S}$  ( $\text{M}^+$ ) 276.0820, found 276.0805.

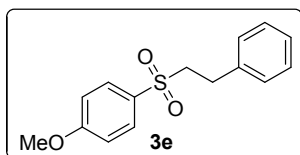

**1-Methoxy-4-(phenethylsulfonyl)benzene**, yield 75%, 41.4 mg;  $^1\text{H}$  NMR (400 MHz  $\text{CDCl}_3$ ):  $\delta$  7.86 (d,  $J = 8.8$  Hz, 2H), 7.28–7.18 (m, 3H), 7.11 (d,  $J = 7.6$  Hz, 2H), 7.12 (d,  $J = 8.8$  Hz, 2H), 3.89 (s, 3H), 3.35–3.32 (m, 2H), 3.05–3.01 (m, 2H).  $^{13}\text{C}$  NMR (100 MHz  $\text{CDCl}_3$ ):  $\delta$  163.82, 137.62, 130.52, 130.29, 128.80, 128.30, 126.88, 114.56, 57.83, 55.73, 28.96. This compound is known.<sup>6</sup>

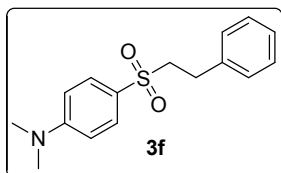

**N,N-dimethyl-4-(phenethylsulfonyl)aniline**, yellow solid, m.p. 110 °C-112 °C, yield 41%, 23.7 mg;  $^1\text{H}$  NMR (400 MHz  $\text{CDCl}_3$ ):  $\delta$  7.73 (d,  $J = 8.8$  Hz, 2H), 7.28–7.11 (m, 5H), 6.71 (d,  $J = 9.2$  Hz, 2H), 3.32–3.28 (m, 2H), 3.07 (s, 6H), 3.05–3.00 (m, 2H).  $^{13}\text{C}$  NMR (100 MHz  $\text{CDCl}_3$ ):  $\delta$  153.49, 138.03, 129.79, 128.73, 128.31, 126.73, 123.91, 111.04, 58.07, 40.09, 29.17. HRMS Calcd. for  $\text{C}_{16}\text{H}_{19}\text{NO}_2\text{S}$  ( $\text{M}^+$ ) 289.1136, found 289.1126.

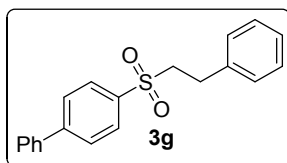

**4-(Phenethylsulfonyl)-1,1'-biphenyl**, white solid, m.p. 108 °C-109 °C, yield 69%, 44.4 mg;  $^1\text{H}$  NMR (400 MHz  $\text{CDCl}_3$ ):  $\delta$  7.98 (d,  $J = 8.4$  Hz, 2H), 7.76 (d,  $J = 8.4$  Hz, 2H), 7.61 (d,  $J = 7.6$  Hz, 2H), 7.51–7.41 (m, 3H), 7.28–7.18 (m, 3H), 7.12 (d,  $J = 7.6$  Hz, 2H), 3.42–3.38 (m, 2H), 3.11–3.06 (m, 2H).  $^{13}\text{C}$  NMR (100 MHz  $\text{CDCl}_3$ ):  $\delta$  146.79, 139.12, 137.53, 137.49, 129.15, 128.84, 128.75, 128.66, 128.35, 127.99, 127.43, 126.95, 57.65, 28.84. HRMS Calcd. for  $\text{C}_{20}\text{H}_{18}\text{O}_2\text{S}$  ( $\text{M}^+$ ) 322.1028, found 322.1014.

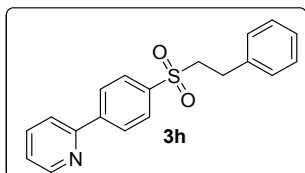

**2-(4-(Phenethylsulfonyl)phenyl)pyridine**, white solid, m.p. 101 °C-103 °C, yield 81%, 52.3 mg;  $^1\text{H}$  NMR (400 MHz  $\text{CDCl}_3$ ):  $\delta$  8.74 (d,  $J = 4.4$  Hz, 1H), 8.20 (d,  $J = 8.0$  Hz, 2H), 8.03 (d,  $J = 8.0$  Hz, 2H), 7.84–7.78 (m, 2H), 7.34–7.18 (m, 4H), 7.11 (d,  $J = 7.6$  Hz, 2H), 3.42–3.38 (m, 2H), 3.08–3.04 (m, 2H).  $^{13}\text{C}$  NMR (100 MHz  $\text{CDCl}_3$ ):  $\delta$  155.21, 150.10, 144.61, 138.90, 137.41, 137.17, 128.85, 128.61, 128.32, 127.79, 126.96, 123.46, 121.21, 57.62, 28.87. HRMS Calcd. for  $\text{C}_{19}\text{H}_{17}\text{NO}_2\text{S}$  ( $\text{M}^+$ ) 323.0980, found 323.0970.

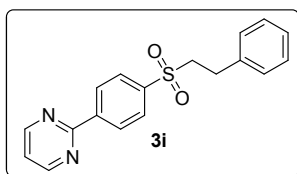

**2-(4-(phenethylsulfonyl)phenyl)pyrimidine**, white solid, m.p. 125 °C-127 °C, yield 83%, 53.8 mg; <sup>1</sup>H NMR (400 MHz CDCl<sub>3</sub>): δ 7.92 (d, *J* = 8.0 Hz, 2H), 7.77 (d, *J* = 8.4 Hz, 2H), 7.46–7.41 (m, 2H), 7.28–7.11 (m, 6H), 3.40–3.36 (m, 2H), 3.09–3.04 (m, 2H). <sup>13</sup>C NMR (100 MHz CDCl<sub>3</sub>): δ 162.91, 157.51, 142.67, 140.50, 137.38, 129.03, 128.85, 128.39, 128.32, 126.98, 120.21, 57.59, 28.81.

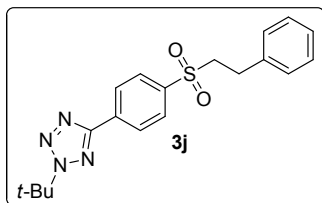

**2-(Tert-butyl)-5-(4-(phenethylsulfonyl)phenyl)-2H-tetrazole**, light yellow oil, yield 53%, 39.3 mg; <sup>1</sup>H NMR (400 MHz CDCl<sub>3</sub>): δ 8.39–8.37 (m, 2H), 8.06–8.04 (m, 2H), 7.28–7.11 (m, 5H), 3.43–3.39 (m, 2H), 3.09–3.05 (m, 2H), 1.82 (s, 9H). <sup>13</sup>C NMR (100 MHz CDCl<sub>3</sub>): δ 162.90, 140.04, 137.30, 133.12, 128.86, 128.72, 128.31, 127.61, 127.00, 64.51, 57.57, 29.43, 28.79.

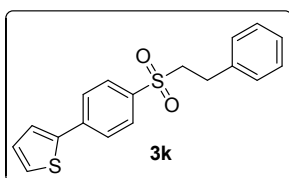

**2-(4-(Phenethylsulfonyl)phenyl)thiophene**, light yellow solid, m.p. 130 °C-131 °C, yield 32%, 21.0 mg; <sup>1</sup>H NMR (400 MHz CDCl<sub>3</sub>): δ 7.92 (d, *J* = 8.0 Hz, 2H), 7.77 (d, *J* = 8.4 Hz, 2H), 7.46–7.41 (m, 2H), 7.28–7.11 (m, 6H), 3.40–3.36 (m, 2H), 3.09–3.04 (m, 2H). <sup>13</sup>C NMR (100 MHz CDCl<sub>3</sub>): δ 141.92, 139.73, 137.43, 137.15, 128.89, 128.84, 128.57, 128.32, 127.21, 126.95, 126.29, 125.34, 57.65, 28.85. HRMS Calcd. for C<sub>18</sub>H<sub>16</sub>O<sub>2</sub>S<sub>2</sub> (M<sup>+</sup>) 328.0592, found 328.0581.

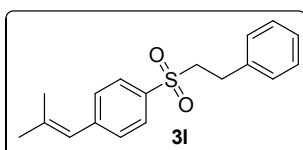

**1-(2-Methylprop-1-en-1-yl)-4-(phenethylsulfonyl)benzene**, colorless oil, yield 67%, 40.2 mg; <sup>1</sup>H NMR (400 MHz CDCl<sub>3</sub>): δ 7.85 (d, *J* = 7.6 Hz, 2H), 7.38 (d, *J* = 8.0 Hz, 2H), 7.27–7.17 (m, 3H), 7.11 (d, *J* = 7.6 Hz, 2H), 6.30 (s, 1H), 3.38–3.34 (m, 2H), 3.08–3.03 (m, 2H), 1.94 (s, 3H), 1.89 (s, 3H). <sup>13</sup>C NMR (100 MHz CDCl<sub>3</sub>): δ 144.50, 139.57, 137.60, 135.80, 129.40, 128.81, 128.32, 127.93, 126.90, 123.79, 57.62, 28.81, 27.14, 19.64. HRMS Calcd. for C<sub>18</sub>H<sub>20</sub>O<sub>2</sub>S (M<sup>+</sup>) 300.1184, found 300.1175.

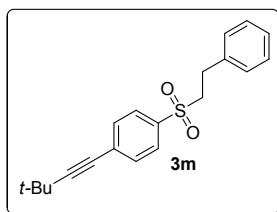

**1-(3,3-Dimethylbut-1-yn-1-yl)-4-(phenethylsulfonyl)benzene**, white solid, m.p. 102 °C-104 °C, yield 71%, 46.3 mg;  $^1\text{H}$  NMR (400 MHz  $\text{CDCl}_3$ ):  $\delta$  7.83 (d,  $J = 8.0$  Hz, 2H), 7.55 (d,  $J = 8.0$  Hz, 2H), 7.29–7.19 (m, 3H), 7.10 (d,  $J = 7.6$  Hz, 2H), 3.36–3.32 (m, 2H), 3.04–2.99 (m, 2H), 1.33 (s, 9H).  $^{13}\text{C}$  NMR (100 MHz  $\text{CDCl}_3$ ):  $\delta$  137.39, 137.18, 132.30, 130.25, 128.86, 128.30, 127.93, 126.98, 103.35, 77.86, 57.60, 30.77, 28.83, 28.14. HRMS Calcd. for  $\text{C}_{20}\text{H}_{22}\text{O}_2\text{S}$  ( $\text{M}^+$ ) 326.1341, found 326.1332.

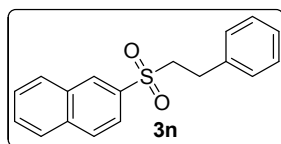

**2-(Phenethylsulfonyl)naphthalene**, white solid, m.p. 92 °C-94 °C, yield 66%, 39.1 mg;  $^1\text{H}$  NMR (400 MHz  $\text{CDCl}_3$ ):  $\delta$  8.51 (s, 1H), 8.02–7.88 (m, 4H), 7.70–7.62 (m, 2H), 7.25–7.09 (m, 5H), 3.46–3.42 (m, 2H), 3.10–3.06 (m, 2H).  $^{13}\text{C}$  NMR (100 MHz  $\text{CDCl}_3$ ):  $\delta$  137.45, 135.87, 135.37, 132.21, 130.03, 129.72, 129.46, 129.37, 128.80, 128.30, 128.03, 127.80, 126.92, 122.67, 57.58, 28.89. HRMS Calcd. for  $\text{C}_{18}\text{H}_{16}\text{O}_2\text{S}$  ( $\text{M}^+$ ) 296.0871, found 296.0867.

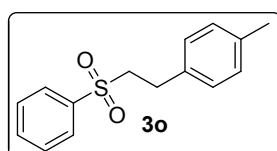

**1-Methyl-4-(2-(phenylsulfonyl)ethyl)benzene**, colorless oil, yield 73%, 38.0 mg;  $^1\text{H}$  NMR (400 MHz  $\text{CDCl}_3$ ):  $\delta$  7.94 (d,  $J = 8.0$  Hz, 2H), 7.68–7.55 (m, 3H), 7.08–6.99 (m, 4H), 3.36–3.32 (m, 2H), 3.02–2.98 (m, 2H), 2.29 (s, 3H).  $^{13}\text{C}$  NMR (100 MHz  $\text{CDCl}_3$ ):  $\delta$  139.09, 136.56, 134.37, 133.77, 129.48, 129.35, 128.16, 128.10, 57.67, 28.34, 20.99.

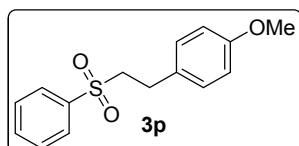

**1-Methoxy-4-(2-(phenylsulfonyl)ethyl)benzene**, light yellow oil, yield 76%, 42.0 mg;  $^1\text{H}$  NMR (400 MHz  $\text{CDCl}_3$ ):  $\delta$  7.93 (d,  $J = 7.2$  Hz, 2H), 7.68–7.55 (m, 3H), 7.02 (d,  $J = 8.0$  Hz, 2H), 6.79 (d,  $J = 8.4$  Hz, 2H), 3.75 (s, 3H), 3.35–3.31 (m, 2H), 3.00–2.96 (m, 2H).  $^{13}\text{C}$  NMR (100 MHz  $\text{CDCl}_3$ ):



$\delta$  158.54, 139.09, 133.78, 129.40, 129.36, 129.31, 128.08, 114.23, 57.76, 55.29, 27.92. HRMS Calcd. for C<sub>15</sub>H<sub>16</sub>O<sub>3</sub>S (M<sup>+</sup>) 276.0820, found 276.0812.

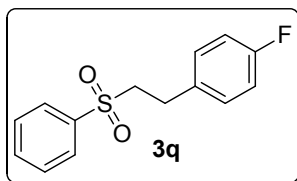

**1-Fluoro-4-(2-(phenylsulfonyl)ethyl)benzene**, light yellow oil, yield 62%, 32.7 mg; <sup>1</sup>H NMR (400 MHz CDCl<sub>3</sub>):  $\delta$  7.93 (d,  $J$  = 7.6 Hz, 2H), 7.67 (t,  $J$  = 7.2 Hz, 1H), 7.58 (t,  $J$  = 7.6 Hz, 2H), 7.10–7.06 (m, 2H), 6.94 (t,  $J$  = 8.4 Hz, 2H), 3.36–3.32 (m, 2H), 3.05–3.01 (m, 2H). <sup>13</sup>C NMR (100 MHz CDCl<sub>3</sub>):  $\delta$  161.78 (d,  $J_{C-F}$  = 244.0 Hz), 138.99, 133.88, 133.13 (d,  $J_{C-F}$  = 3.2 Hz), 129.84 (d,  $J_{C-F}$  = 8.0 Hz), 129.40, 128.07, 115.66 (d,  $J_{C-F}$  = 21.3 Hz), 57.54, 27.98. HRMS Calcd. for C<sub>14</sub>H<sub>13</sub>FO<sub>2</sub>S (M<sup>+</sup>) 264.0620, found 264.0605.

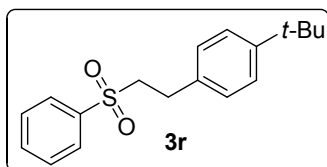

**1-(Tert-butyl)-4-(2-(phenylsulfonyl)ethyl)benzene**, white solid, m.p. 61 °C–62°C, yield 84%, 50.7 mg; <sup>1</sup>H NMR (400 MHz CDCl<sub>3</sub>):  $\delta$  7.93 (d,  $J$  = 8.0 Hz, 2H), 7.67–7.55 (m, 3H), 7.27 (d,  $J$  = 7.6 Hz, 2H), 7.04 (d,  $J$  = 7.6 Hz, 2H), 3.38–3.34 (m, 2H), 3.04–3.00 (m, 2H), 1.28 (s, 9H). <sup>13</sup>C NMR (100 MHz CDCl<sub>3</sub>):  $\delta$  149.90, 139.12, 134.35, 133.74, 129.32, 128.08, 127.96, 125.71, 57.56, 34.43, 31.30, 28.18. HRMS Calcd. for C<sub>18</sub>H<sub>22</sub>O<sub>2</sub>S (M<sup>+</sup>) 302.1341, found 302.1338.

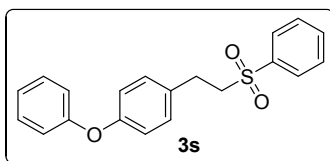

**1-Phenoxy-4-(2-(phenylsulfonyl)ethyl)benzene**, colorless oil, yield 65%, 43.9 mg; <sup>1</sup>H NMR (400 MHz CDCl<sub>3</sub>):  $\delta$  7.92 (d,  $J$  = 7.6 Hz, 2H), 7.67–7.54 (m, 3H), 7.32 (t,  $J$  = 8.0 Hz, 2H), 7.21 (t,  $J$  = 8.0 Hz, 1H), 7.10 (t,  $J$  = 7.6 Hz, 1H), 6.96 (d,  $J$  = 8.0 Hz, 2H), 6.86–6.75 (m, 3H), 3.37–3.32 (m, 2H), 3.03–2.99 (m, 2H). <sup>13</sup>C NMR (100 MHz CDCl<sub>3</sub>):  $\delta$  157.71, 156.84, 139.46, 138.97, 133.88, 130.13, 129.84, 129.40, 128.11, 123.54, 123.06, 119.03, 118.56, 117.19, 57.30, 28.63. HRMS Calcd. for C<sub>20</sub>H<sub>18</sub>O<sub>3</sub>S (M<sup>+</sup>) 338.0977, found 338.0972.

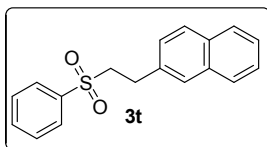

**2-(2-(Phenylsulfonyl)ethyl)naphthalene**, light yellow solid, m.p. 91 °C-92 °C yield 31%, 18.4 mg;  $^1\text{H}$  NMR (400 MHz  $\text{CDCl}_3$ ):  $\delta$  7.96 (d,  $J = 7.6$  Hz, 2H), 7.79–7.72 (m, 3H), 7.65 (t,  $J = 7.6$  Hz, 1H), 7.58–7.55 (m, 3H), 7.47–7.42 (m, 2H), 7.23–7.21 (m, 1H), 3.47–3.43 (m, 2H), 3.24–3.19 (m, 2H).  $^{13}\text{C}$  NMR (100 MHz  $\text{CDCl}_3$ ):  $\delta$  139.06, 134.85, 133.82, 133.49, 132.32, 129.37, 128.60, 128.13, 127.66, 127.46, 126.84, 126.42, 126.36, 125.85, 57.46, 28.96. HRMS Calcd. for  $\text{C}_{18}\text{H}_{16}\text{O}_2\text{S}$  (M+) 296.0871, found 296.0864.

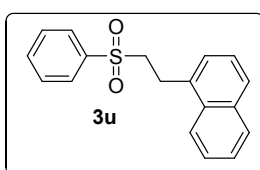

**1-(2-(Phenylsulfonyl)ethyl)naphthalene**, yellow solid, m.p. 98 °C-100 °C yield 46%, 27.3 mg;  $^1\text{H}$  NMR (400 MHz  $\text{CDCl}_3$ ):  $\delta$  7.98 (d,  $J = 7.2$  Hz, 2H), 7.84–7.78 (m, 2H), 7.73–7.65 (m, 2H), 7.59 (t,  $J = 7.6$  Hz, 2H), 7.51–7.45 (m, 2H), 7.34 (t,  $J = 7.6$  Hz, 1H), 7.25 (d,  $J = 6.8$  Hz, 1H), 3.52–3.42 (m, 4H).  $^{13}\text{C}$  NMR (100 MHz  $\text{CDCl}_3$ ):  $\delta$  139.05, 133.95, 133.88, 133.45, 131.23, 129.43, 129.08, 128.14, 127.93, 126.62, 126.51, 125.91, 125.55, 122.75, 56.70, 26.06. HRMS Calcd. for  $\text{C}_{18}\text{H}_{16}\text{O}_2\text{S}$  (M+) 296.0871, found 296.0852.

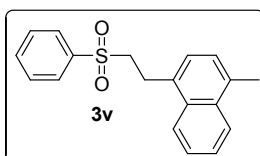

**1-Methyl-4-(2-(phenylsulfonyl)ethyl)naphthalene**, white solid, m.p. 116 °C-118 °C, yield 67%, 41.6 mg;  $^1\text{H}$  NMR (400 MHz  $\text{CDCl}_3$ ):  $\delta$  8.01–7.98 (m, 3H), 7.80–7.78 (m, 1H), 7.69–7.66 (m, 1H), 7.61–7.49 (m, 4H), 7.20–7.14 (m, 2H), 3.49–3.42 (m, 4H), 2.63 (s, 3H).  $^{13}\text{C}$  NMR (100 MHz  $\text{CDCl}_3$ ):  $\delta$  139.06, 134.11, 133.83, 133.08, 131.54, 131.24, 129.40, 128.13, 126.27, 126.26, 126.23, 125.73, 125.19, 123.28, 56.81, 26.07, 19.47. HRMS Calcd. for  $\text{C}_{19}\text{H}_{18}\text{O}_2\text{S}$  (M+) 310.1028, found 310.1025.

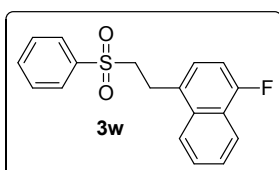

**1-Fluoro-4-(2-(phenylsulfonyl)ethyl)naphthalene**, light yellow solid, m.p. 91 °C-93 °C, yield 56%, 35.2 mg; <sup>1</sup>H NMR (400 MHz CDCl<sub>3</sub>): δ 8.12–8.10 (m, 1H), 7.98 (d, *J* = 7.6 Hz, 2H), 7.79–7.77 (m, 1H), 7.68–7.54 (m, 5H), 7.20–7.17 (m, 1H), 7.03–6.99 (m, 1H), 3.49–3.41 (m, 4H). <sup>13</sup>C NMR (100 MHz CDCl<sub>3</sub>): δ 158.27 (d, *J*<sub>C-F</sub> = 250.3 Hz), 139.01, 133.90, 132.37 (d, *J*<sub>C-F</sub> = 4.6 Hz), 129.42, 129.26 (d, *J*<sub>C-F</sub> = 4.5 Hz), 128.10, 127.55, 126.24 (d, *J*<sub>C-F</sub> = 4.7 Hz), 126.19 (d, *J*<sub>C-F</sub> = 1.8 Hz), 124.16 (d, *J*<sub>C-F</sub> = 16.2 Hz), 122.86 (d, *J*<sub>C-F</sub> = 2.8 Hz), 121.57 (d, *J*<sub>C-F</sub> = 5.7 Hz), 108.95 (d, *J*<sub>C-F</sub> = 19.9 Hz), 56.68, 25.67. HRMS Calcd. for C<sub>18</sub>H<sub>15</sub>FO<sub>2</sub>S (M<sup>+</sup>) 314.0777, found 314.0769.

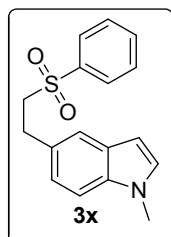

**1-methyl-5-(2-(phenylsulfonyl)ethyl)-1H-indole**, yield 73%; <sup>1</sup>H NMR (400 MHz CDCl<sub>3</sub>): δ 7.96 (d, *J* = 8.0 Hz, 2H), 7.68–7.55 (m, 3H), 7.34 (s, 1H), 7.21 (d, *J* = 8.4 Hz, 1H), 7.02 (d, *J* = 3.2 Hz, 1H), 6.95 (d, *J* = 8.4 Hz, 1H), 6.38 (d, *J* = 2.4 Hz, 1H), 3.75 (s, 3H), 3.42–3.38 (m, 2H), 3.15–3.13 (m, 2H). <sup>13</sup>C NMR (100 MHz CDCl<sub>3</sub>): δ 139.16, 135.73, 133.72, 129.48, 129.33, 128.79, 128.16, 128.13, 121.93, 120.23, 109.58, 100.59, 58.42, 32.91, 28.94.

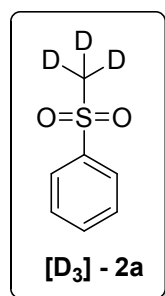

**Trideutero- (methylsulfonyl)benzene**, white solid; <sup>1</sup>H NMR (400 MHz CDCl<sub>3</sub>): δ 7.95 (d, *J* = 7.6 Hz, 2H), 7.69–7.5 (m, 1H), 7.60–7.57 (m, 2H).

---

### C. References

- (1) Q. Zhou, H. D. Srinivas, S. Dasgupta, M. P. Watson, *J. Am. Chem. Soc.* 2013, **135**, 3307.
- (2) (a) B. P. Amit, C. Sukbok, *Org. Lett.* 2015, **17**, 660; (b) S. Wang, M. Wang, L. Wang, P. Li, J. Yang, *Tetrahedron* 2011, **67**, 4800; (c) F. Peter, T. David, N. Per-Ola, *Chirality* 2003, **15**, 360.
- (3) H.-Q. Do, O. Daugulis, *J. Am. Chem. Soc.* 2009, **131**, 17052.
- (4) G. Kimberly, K. Susan, E. Paul, *J. Org. Chem.* 2011, **76**, 2187.
- (5) S. Andre, D. H. Kevin, M. Vincent, C. S. Aaron, *Angew. Chem. Int. Ed.* 2015, **54**, 13571.
- (6) S. Andrei, B. C. Steven, C. S. Aaron, M. Vincent *Org. Lett.*, 2013, **15**, 6226.
- (7) D. W. Jimmie, J. K. Being, K. M. David, T. Ward, A. T. Jon, *J. Am. Chem. Soc.* 2010, **132**, 12179.

## 5. Copies of $^1\text{H}$ NMR and $^{13}\text{C}$ NMR spectra

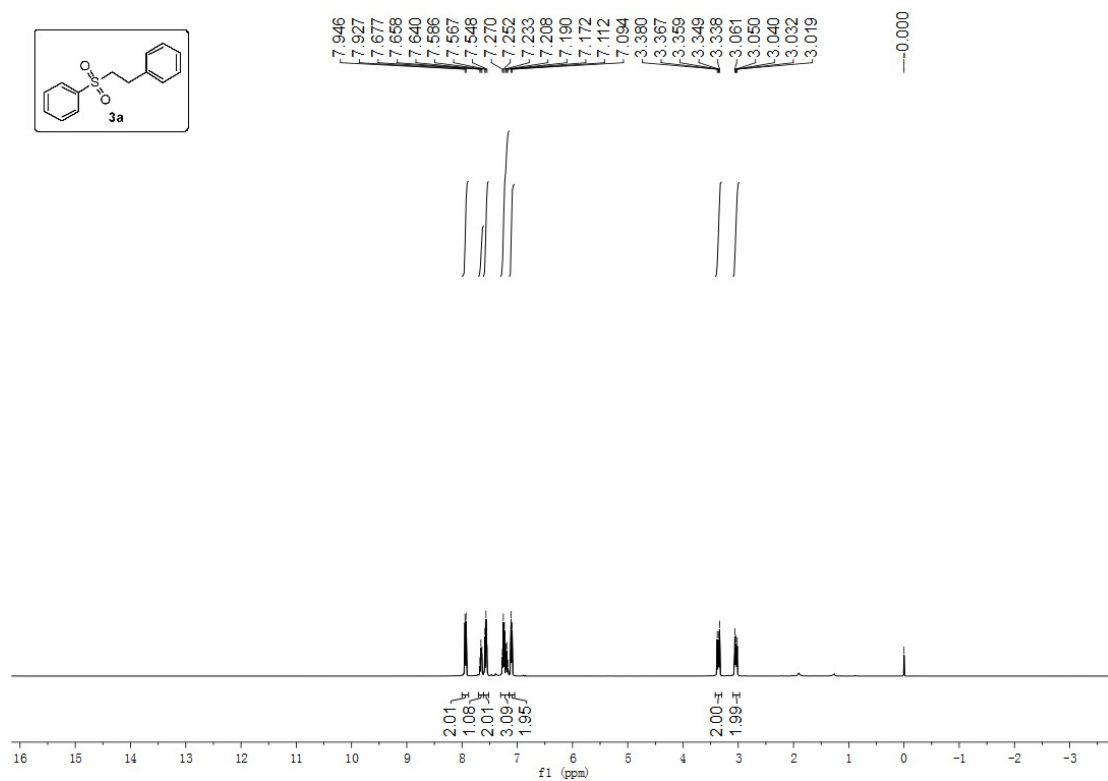

Figure 1.  $^1\text{H}$  NMR spectra of **3a**

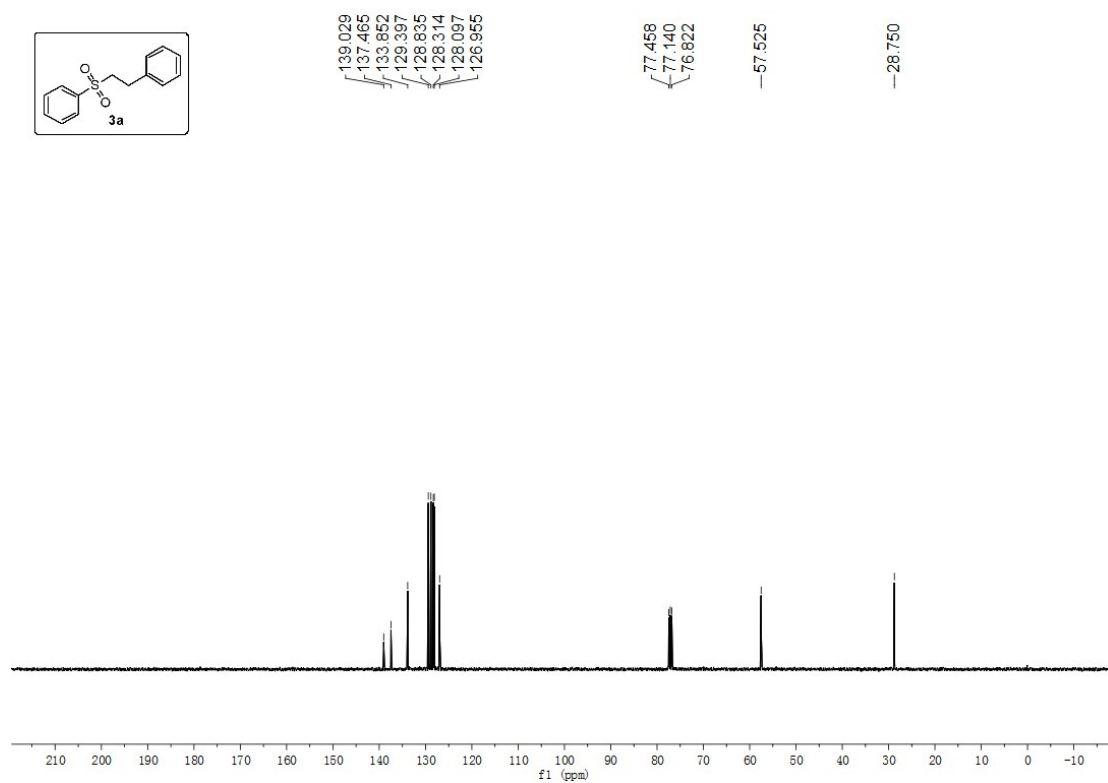

Figure 2.  $^{13}\text{C}$  NMR spectra of **3a**

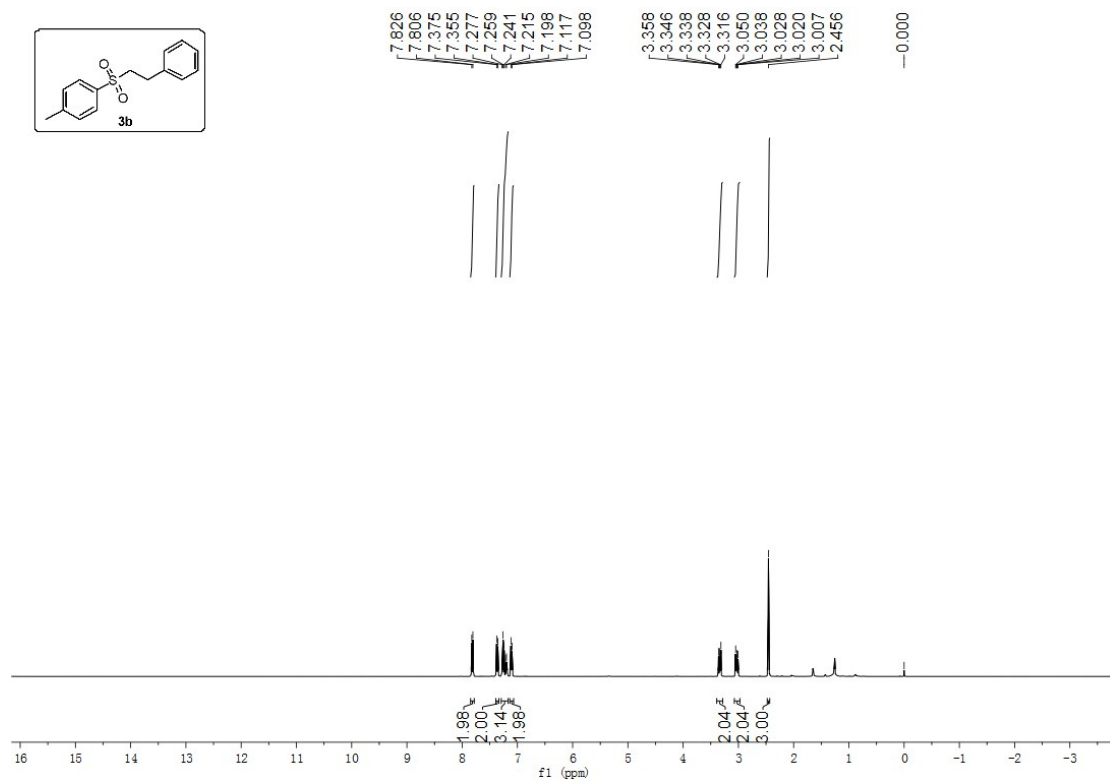

Figure 3. <sup>1</sup>H NMR spectra of **3b**

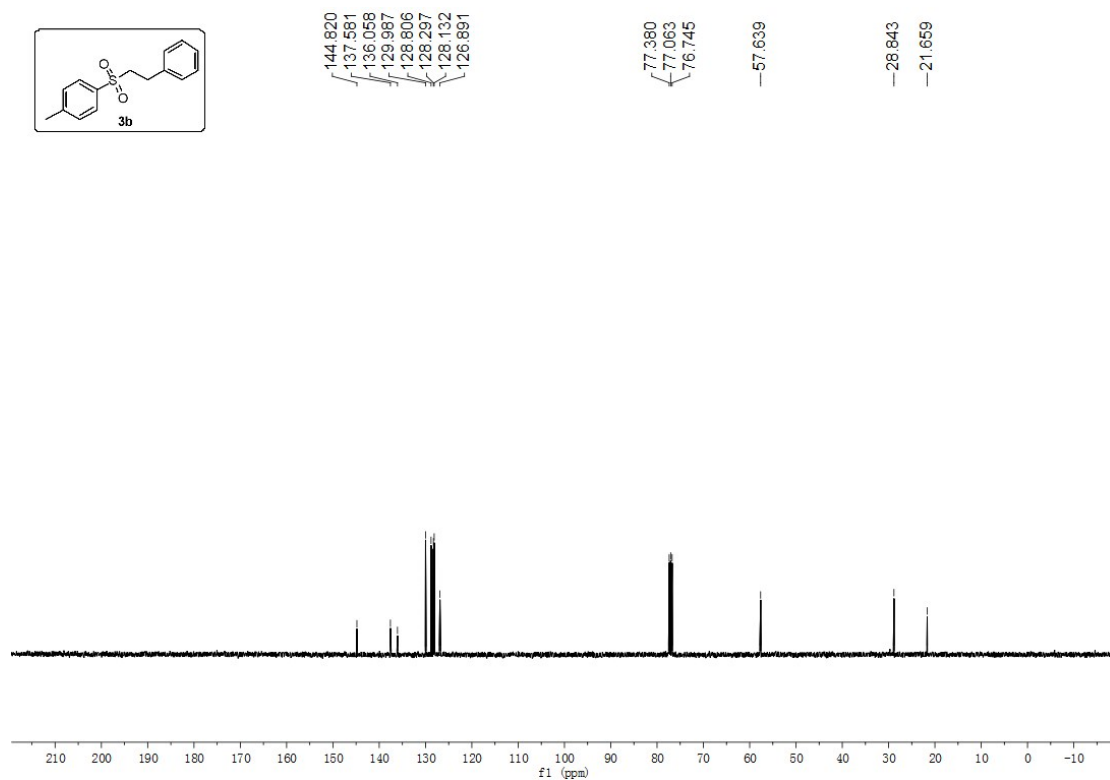

Figure 4. <sup>13</sup>C NMR spectra of **3b**

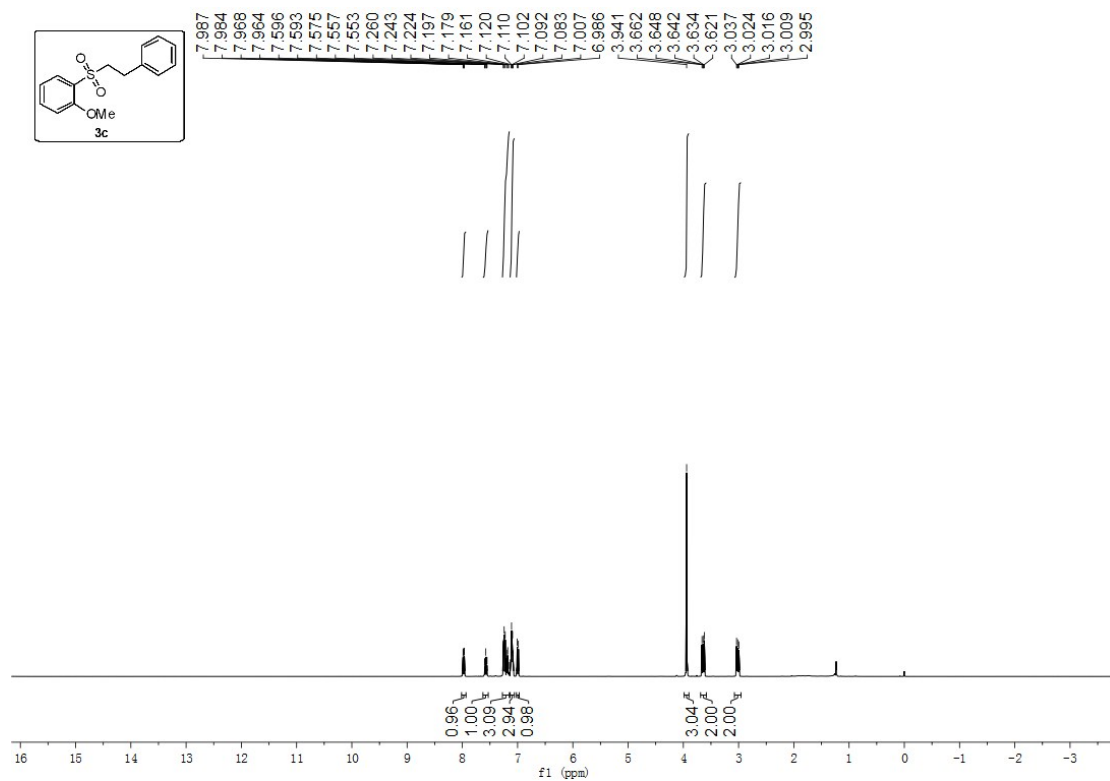

Figure 5. <sup>1</sup>H NMR spectra of **3c**

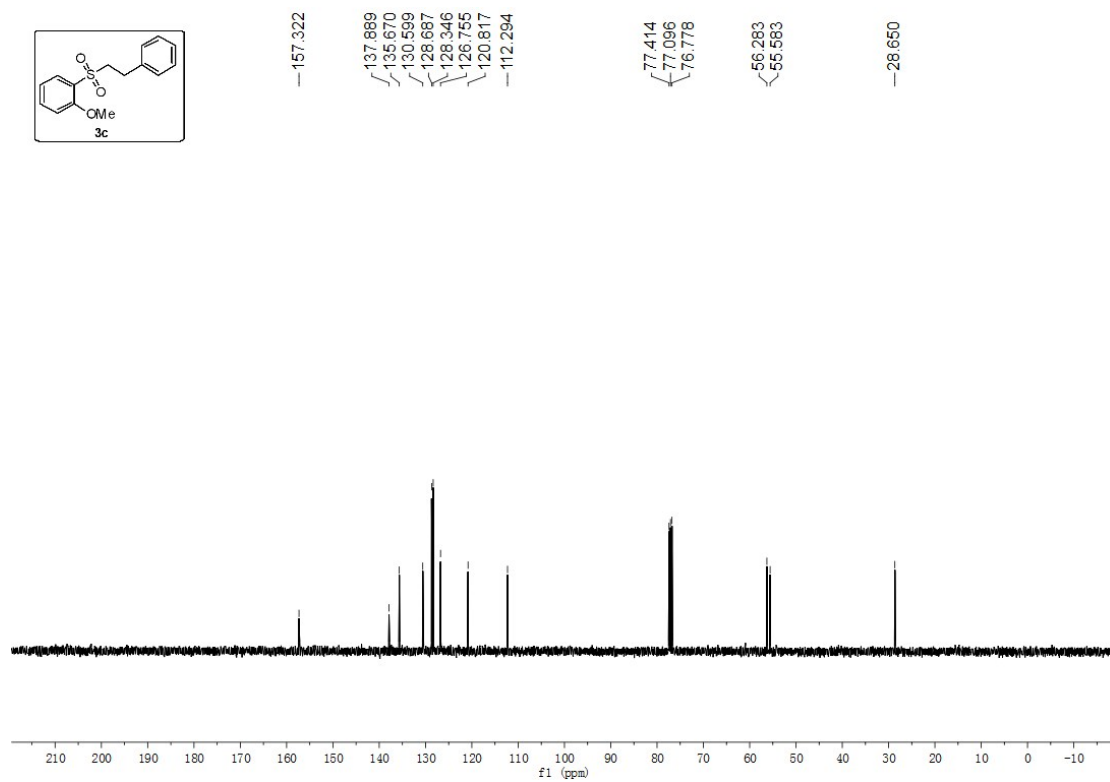

Figure 6. <sup>13</sup>C NMR spectra of **3c**

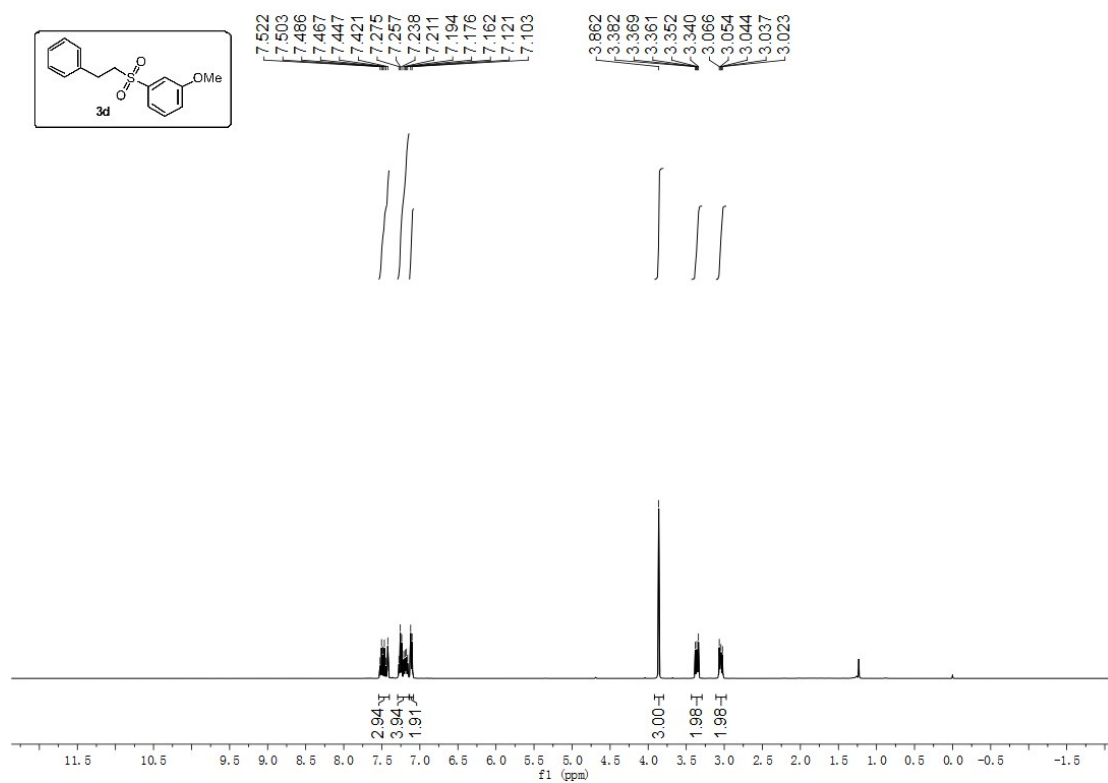

Figure 7. <sup>1</sup>H NMR spectra of **3d**

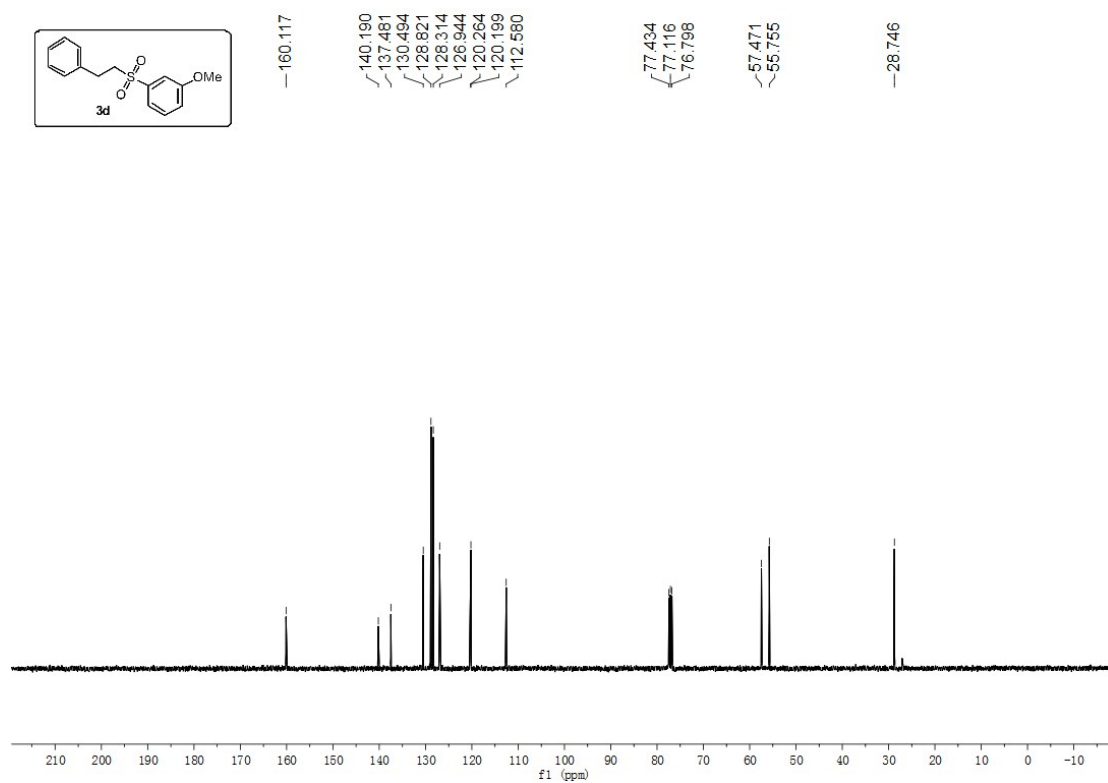

Figure 8. <sup>13</sup>C NMR spectra of **3d**



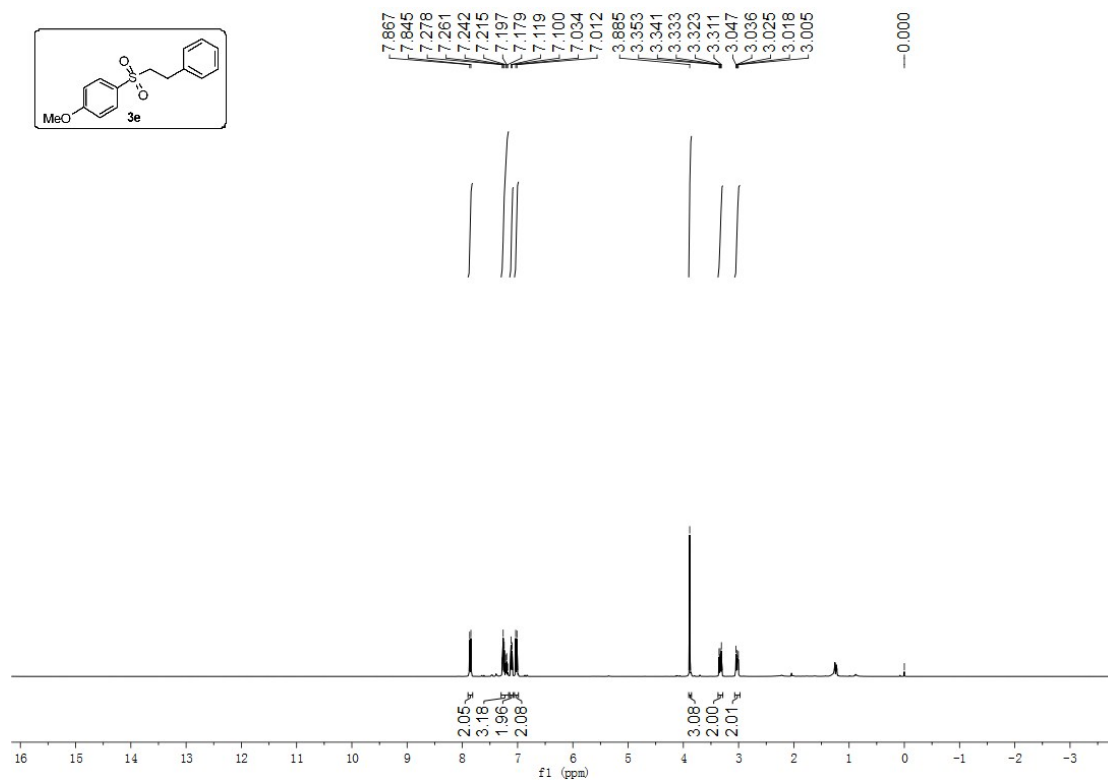

Figure 9. <sup>1</sup>H NMR spectra of **3e**

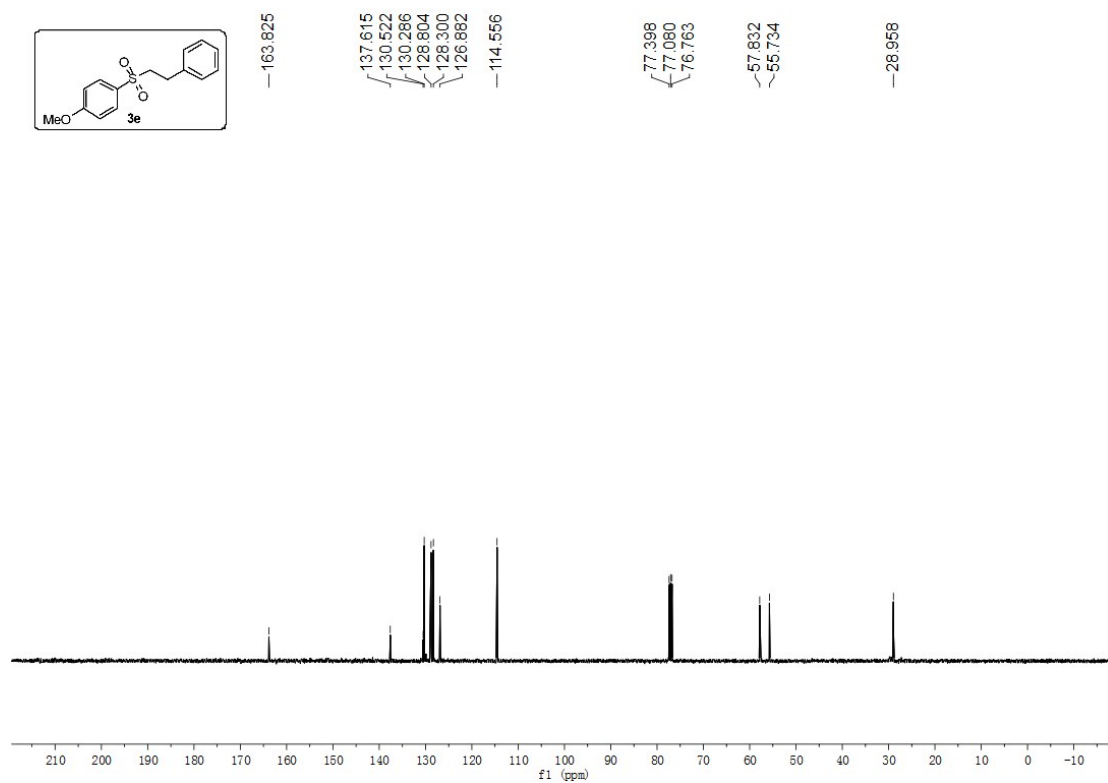

Figure 10. <sup>13</sup>C NMR spectra of **3e**

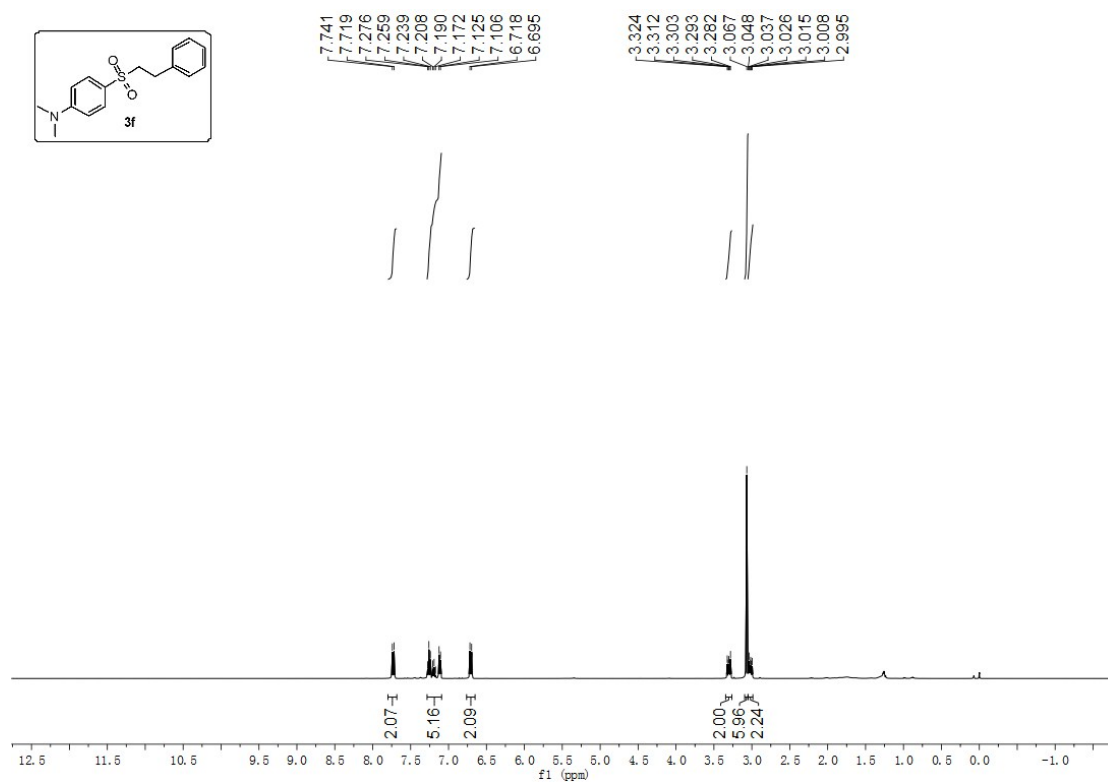

Figure 11. <sup>1</sup>H NMR spectra of **3f**

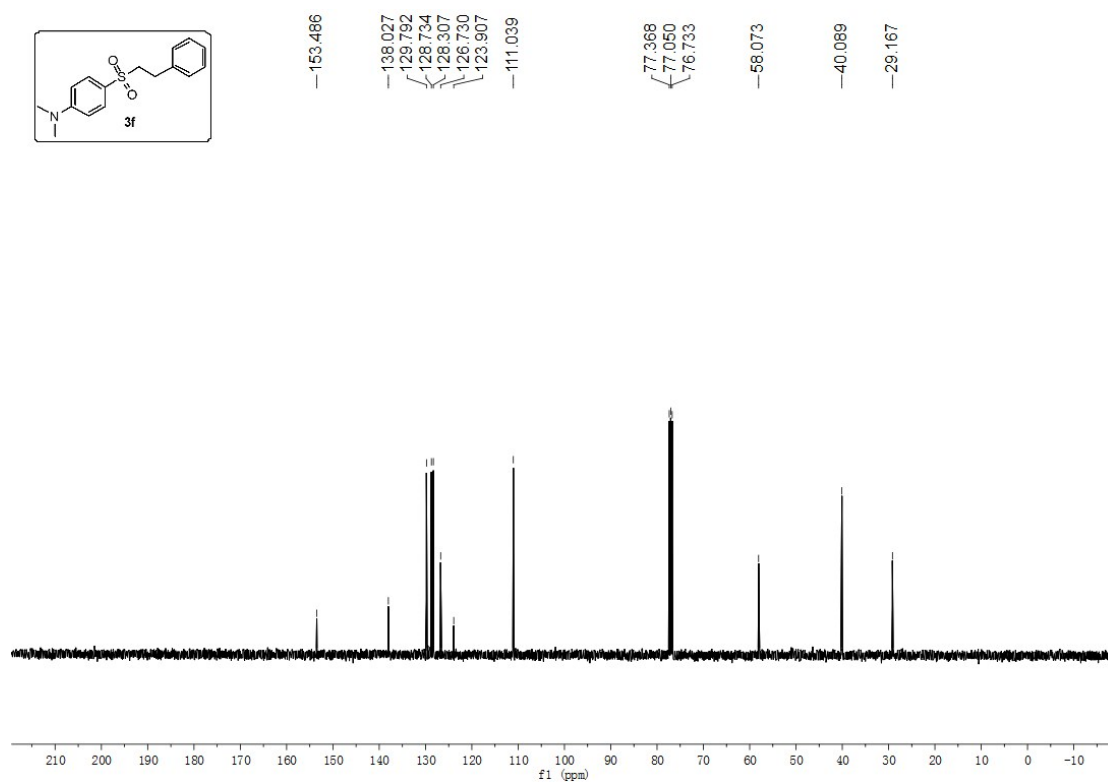

Figure 12. <sup>13</sup>C NMR spectra of **3f**

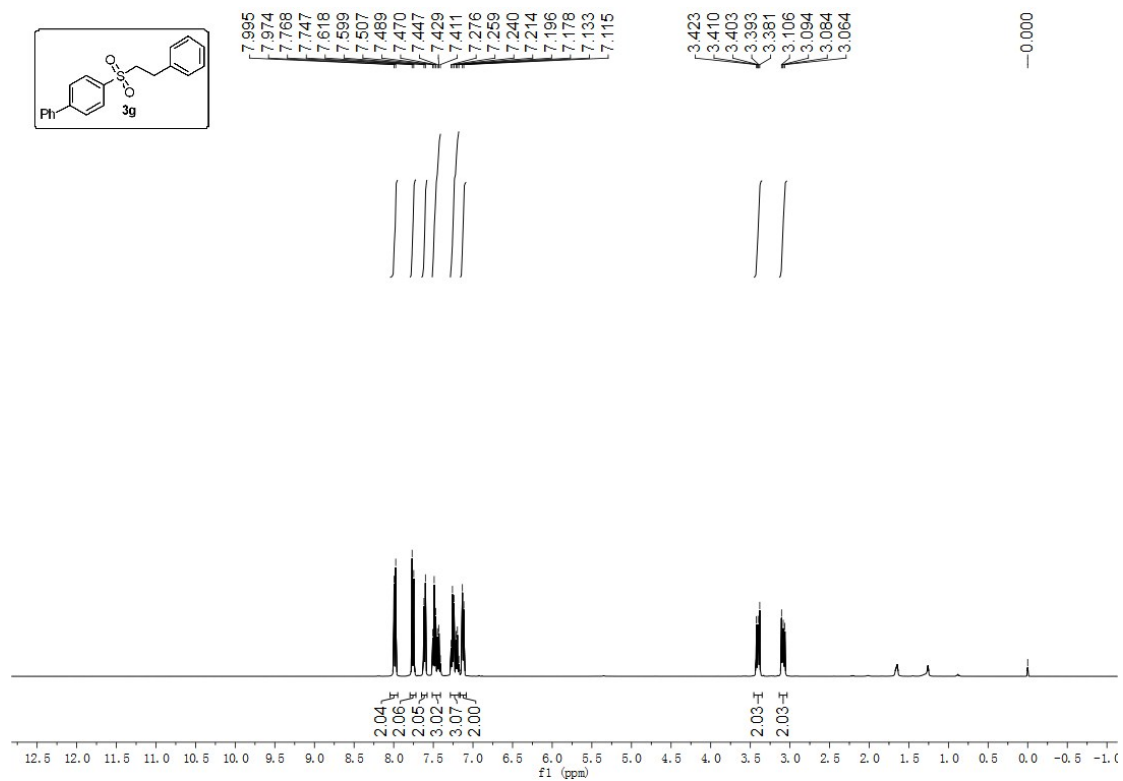

Figure 13. <sup>1</sup>H NMR spectra of **3g**

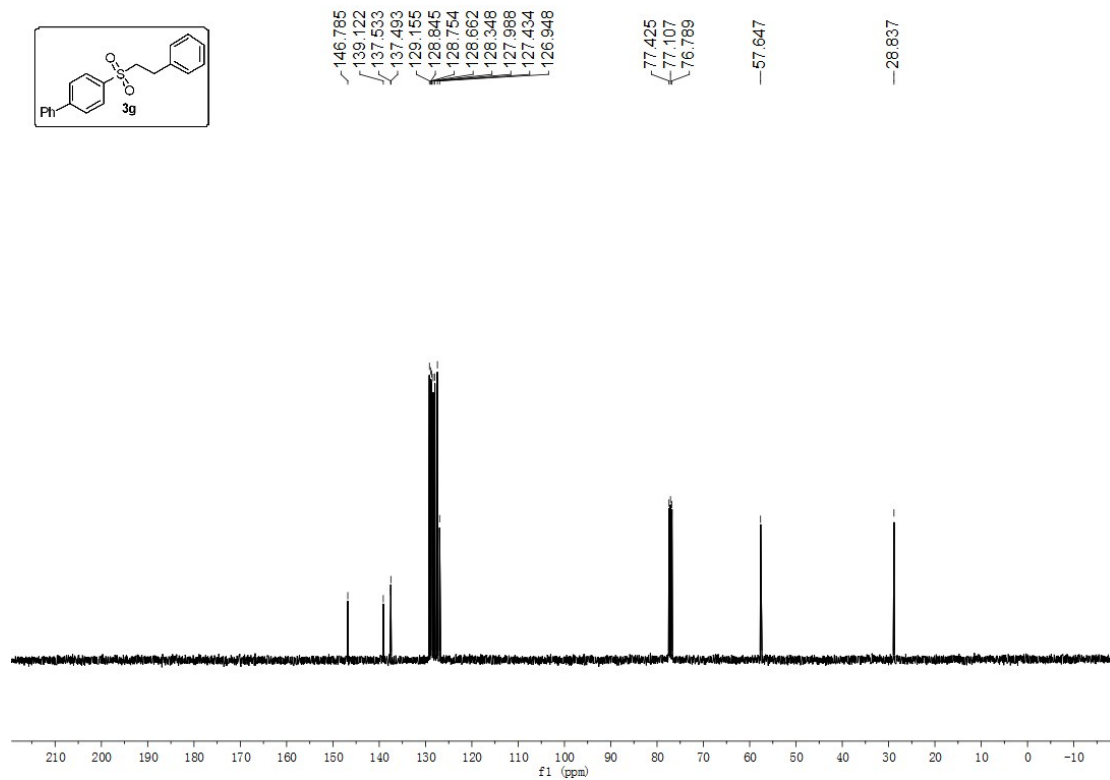

Figure 14. <sup>13</sup>C NMR spectra of **3g**

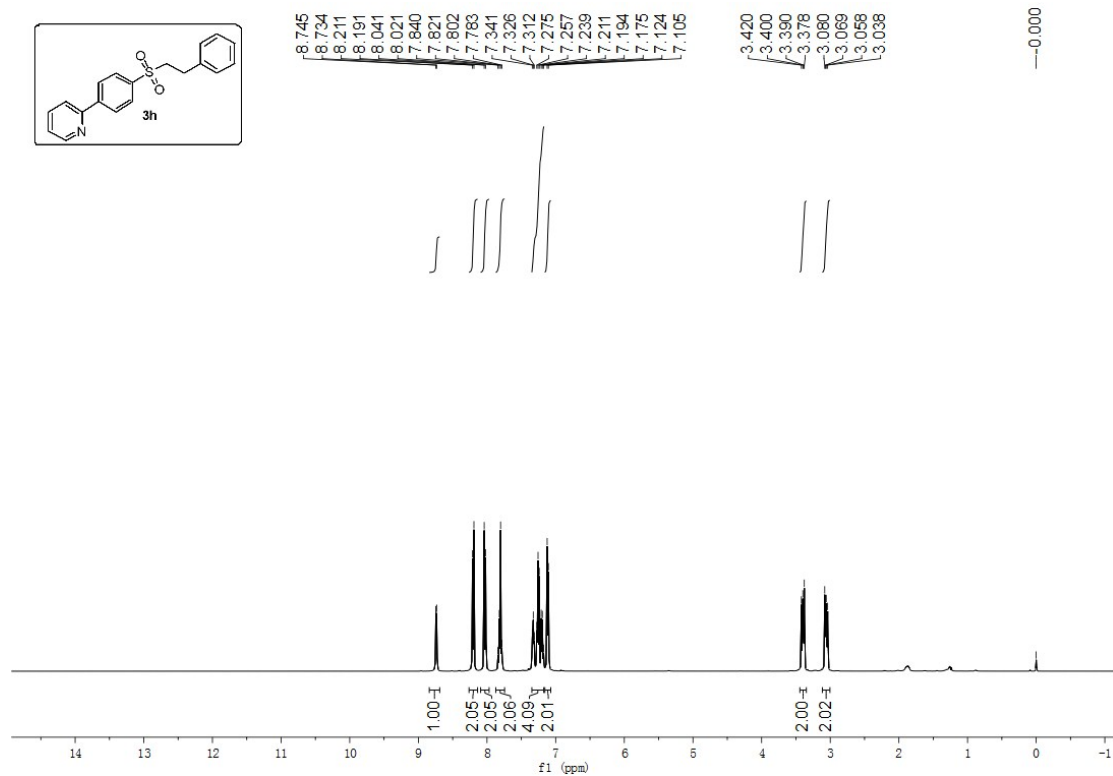

Figure 15. <sup>1</sup>H NMR spectra of **3h**

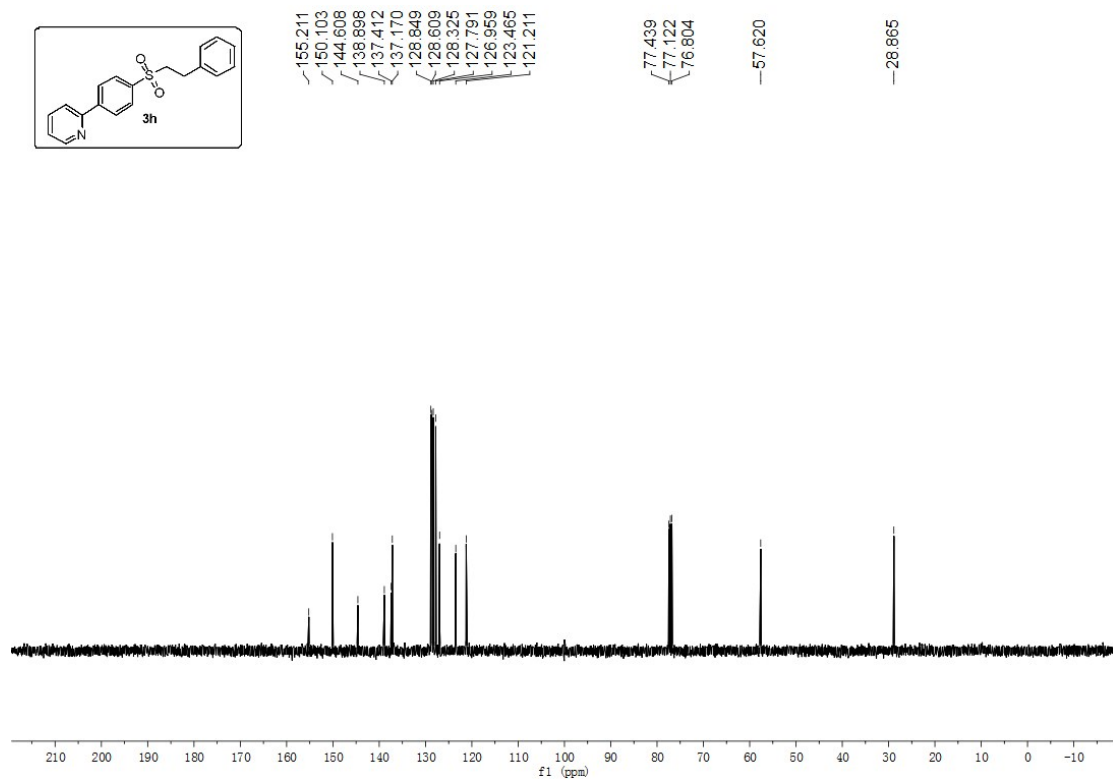

Figure 16. <sup>13</sup>C NMR spectra of **3h**

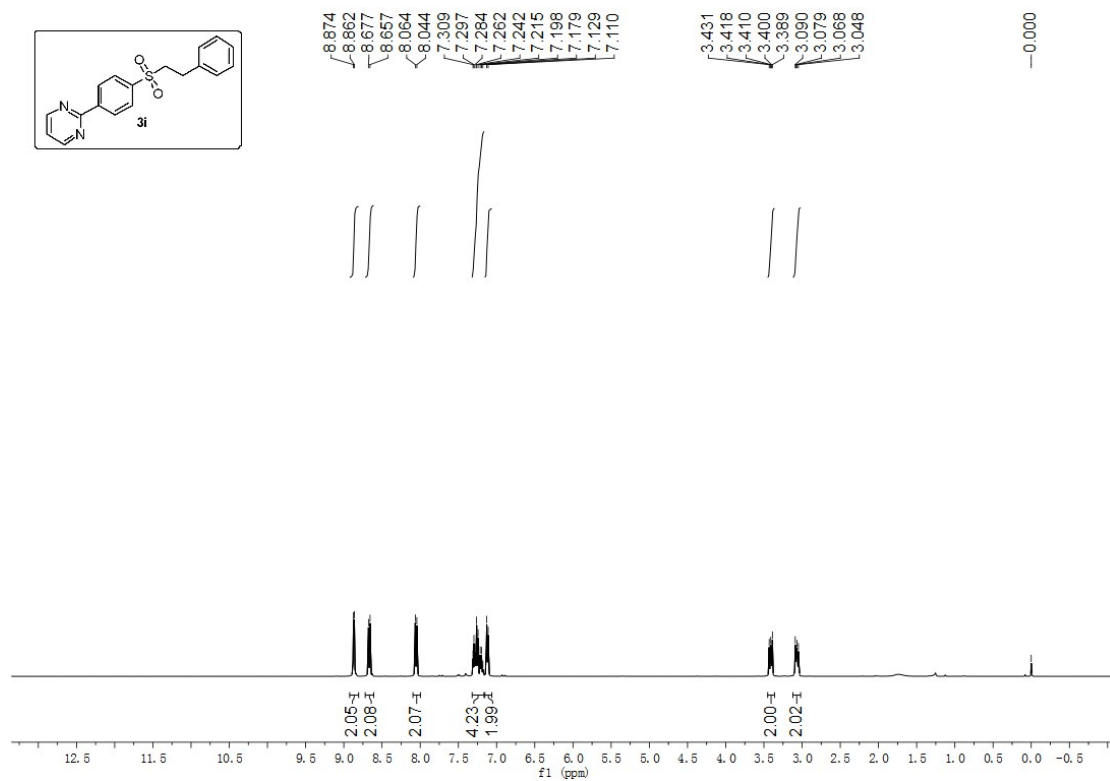

Figure 17. <sup>1</sup>H NMR spectra of **3i**

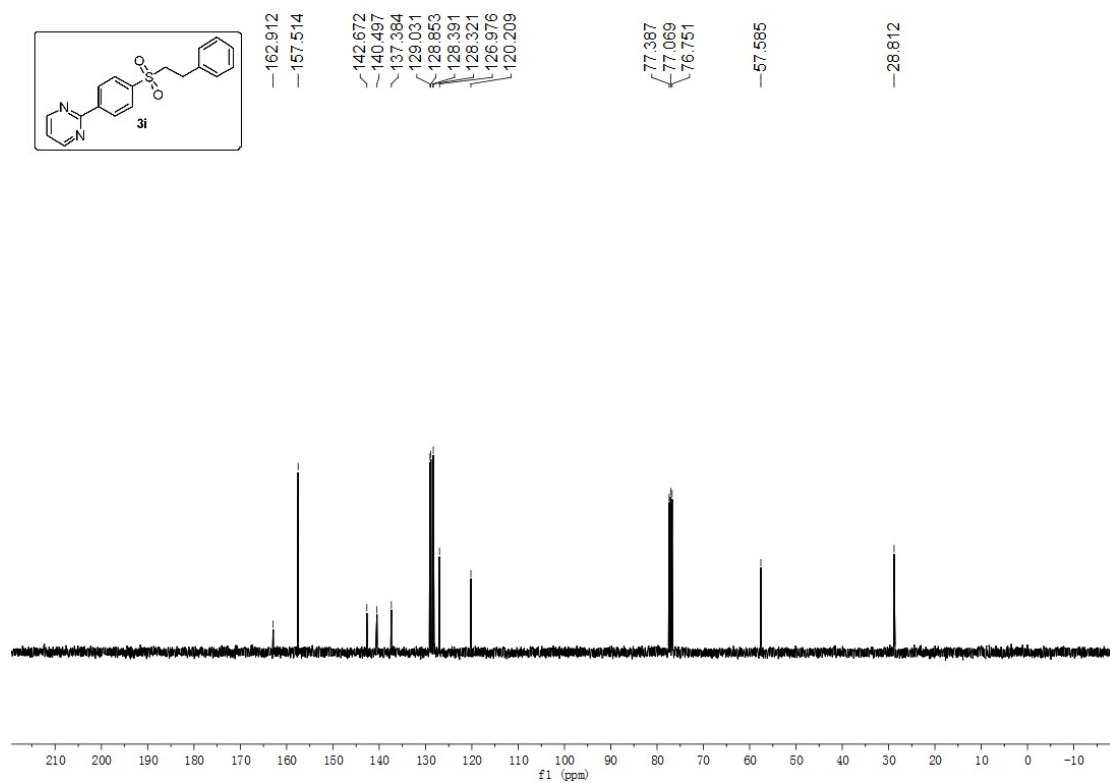

Figure 18. <sup>13</sup>C NMR spectra of **3i**

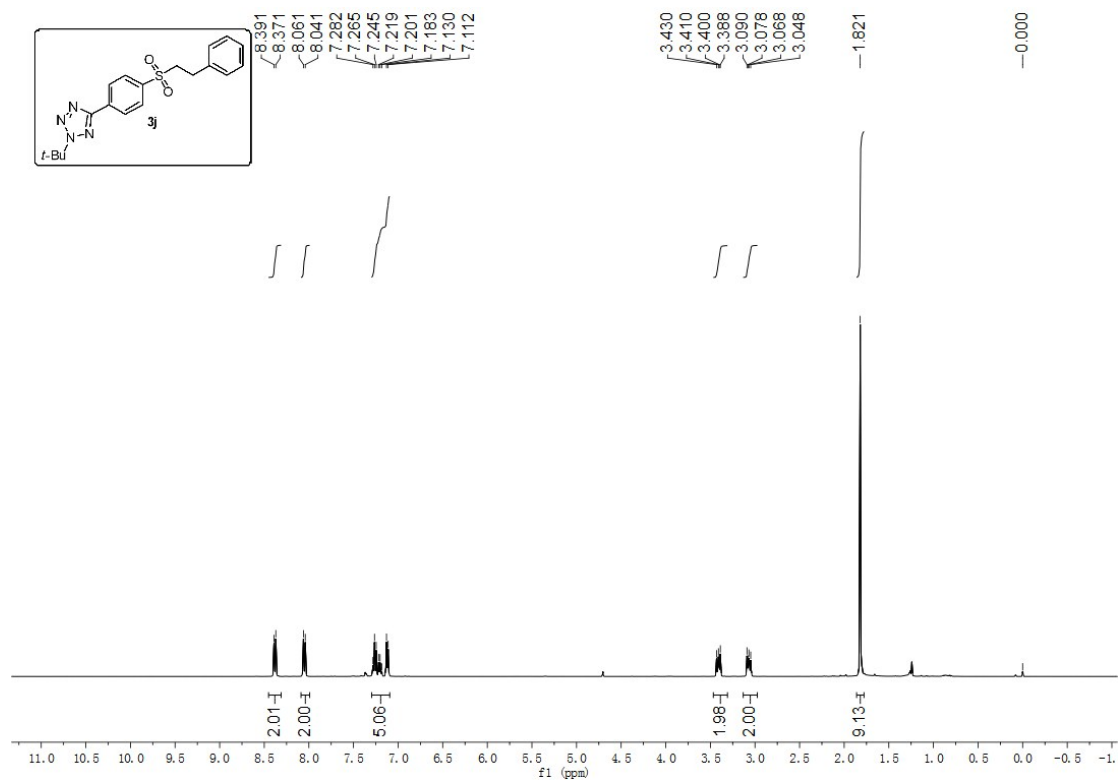

Figure 19. <sup>1</sup>H NMR spectra of **3j**

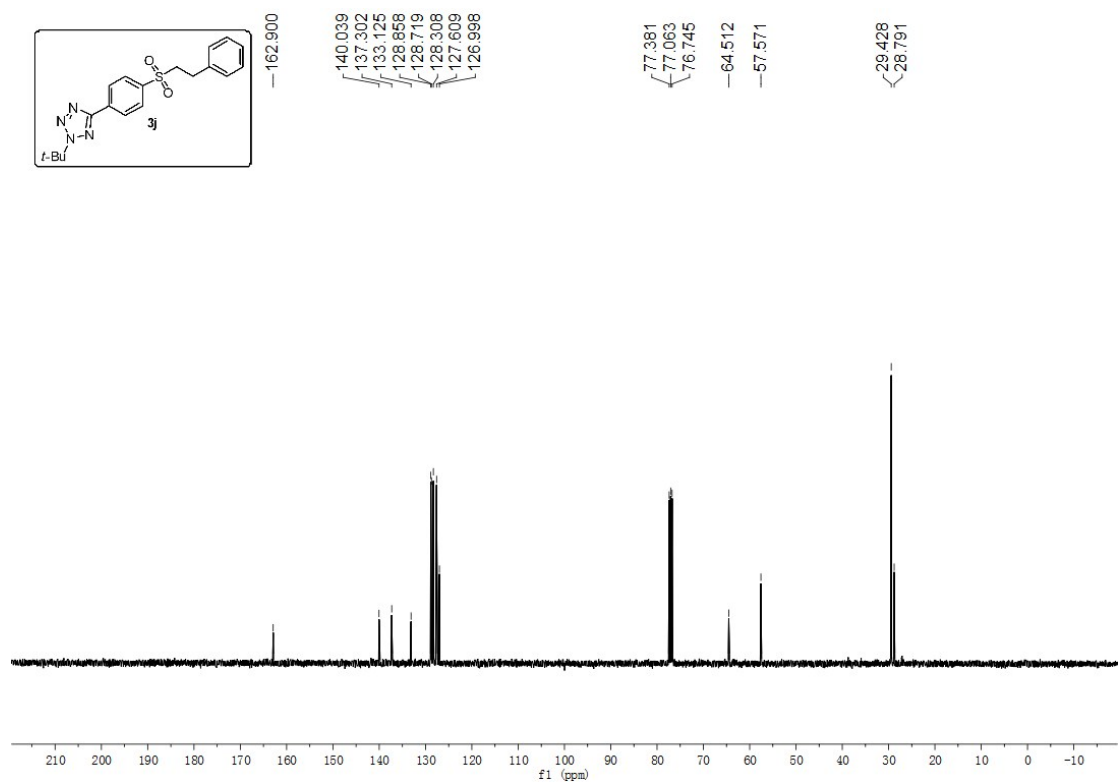

Figure 20. <sup>13</sup>C NMR spectra of **3j**

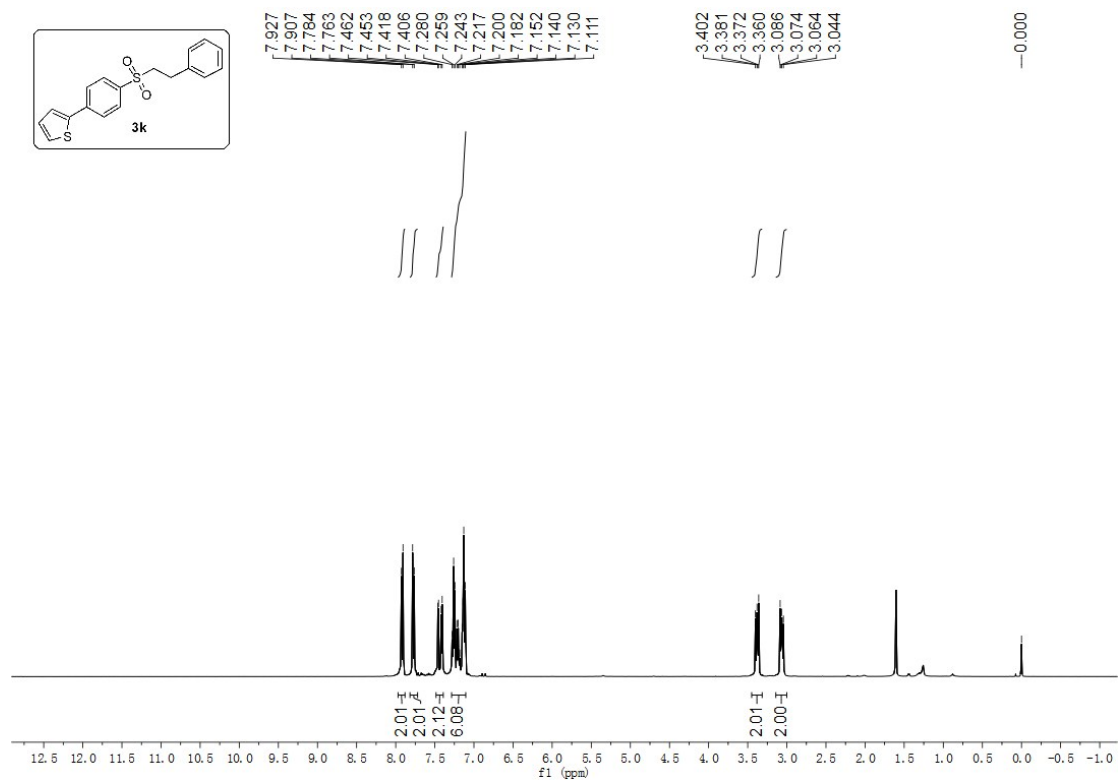

Figure 21. <sup>1</sup>H NMR spectra of **3k**

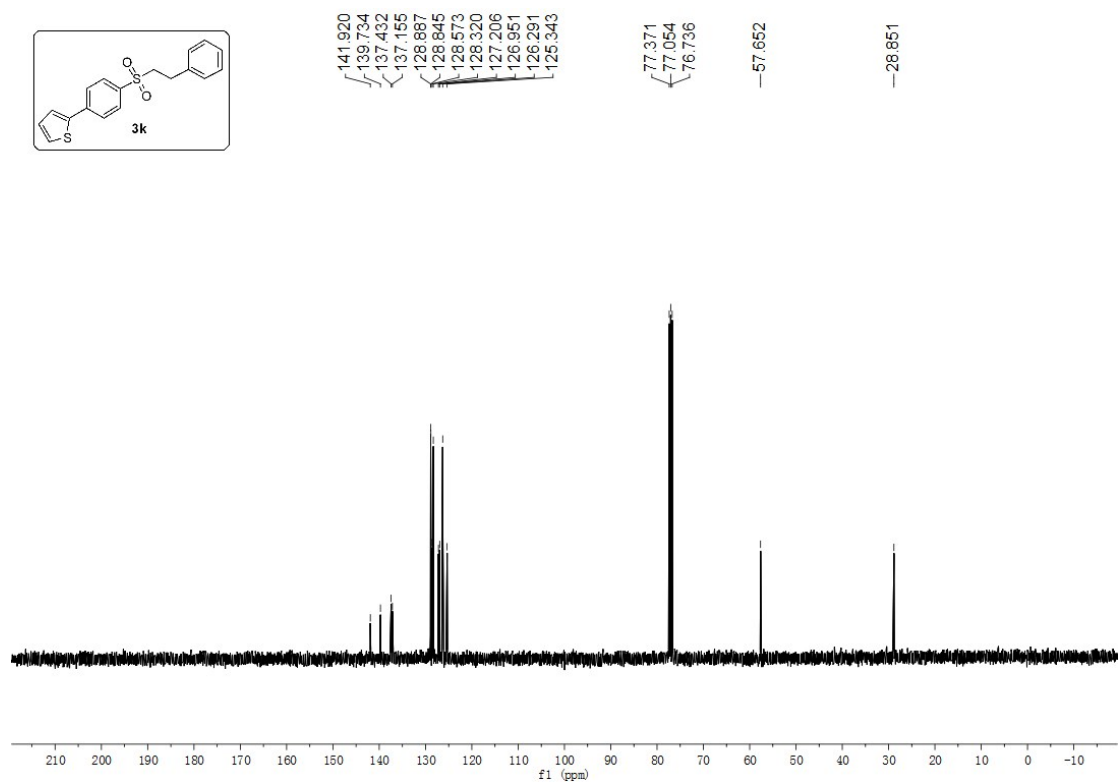

Figure 22. <sup>13</sup>C NMR spectra of **3k**

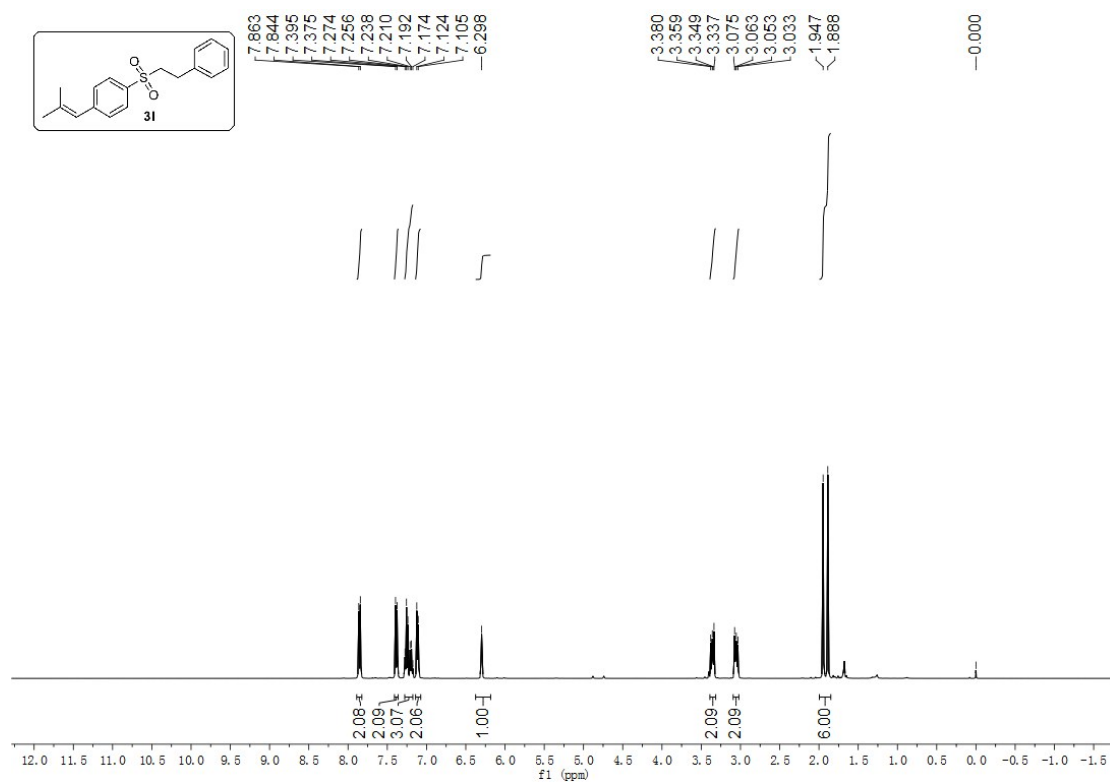

Figure 23. <sup>1</sup>H NMR spectra of **31**

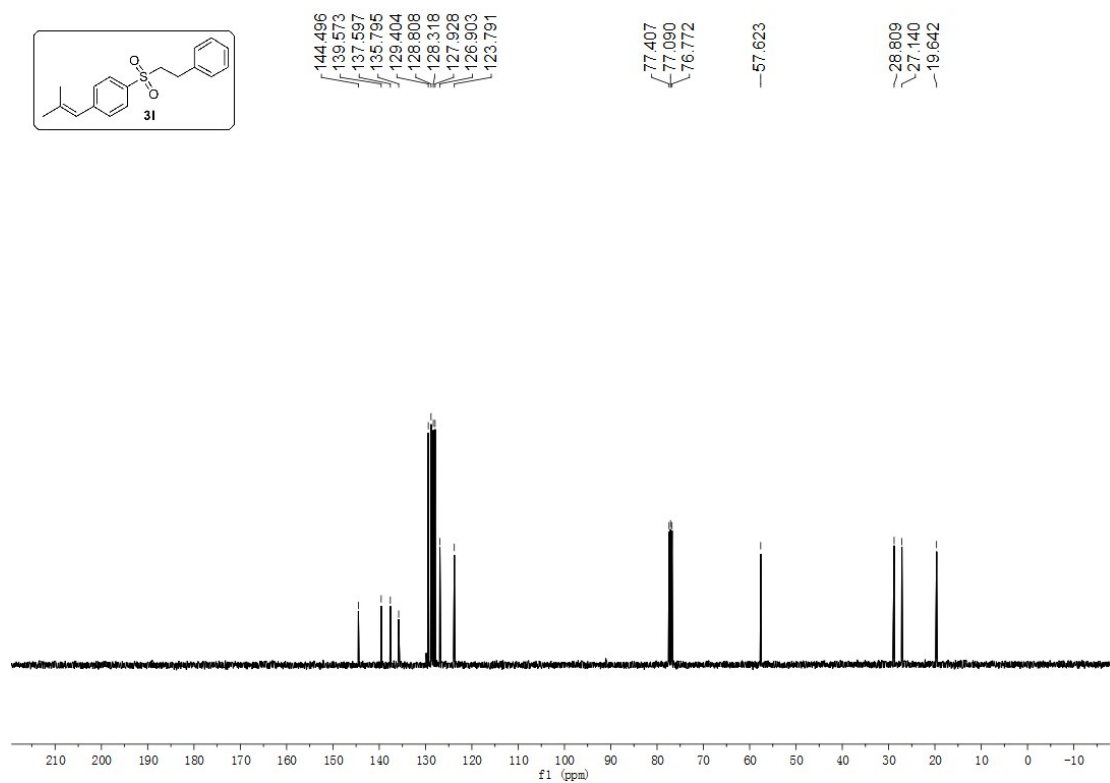

Figure 24. <sup>13</sup>C NMR spectra of **31**



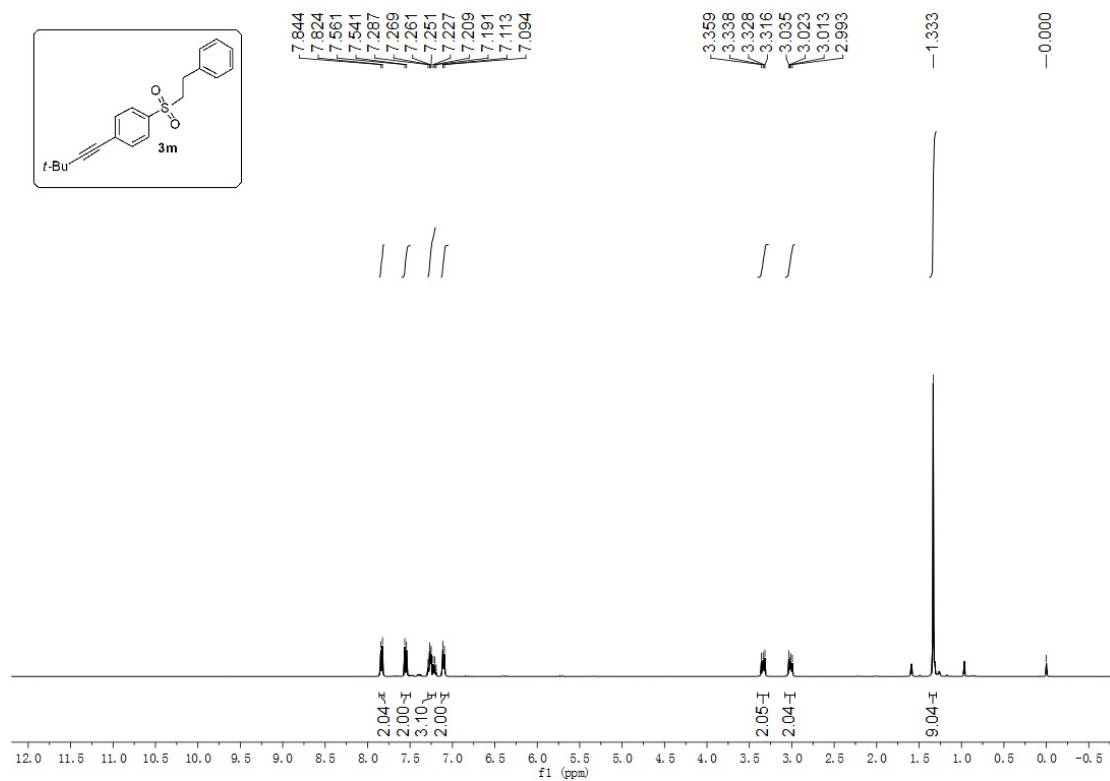

Figure 25. <sup>1</sup>H NMR spectra of **3m**

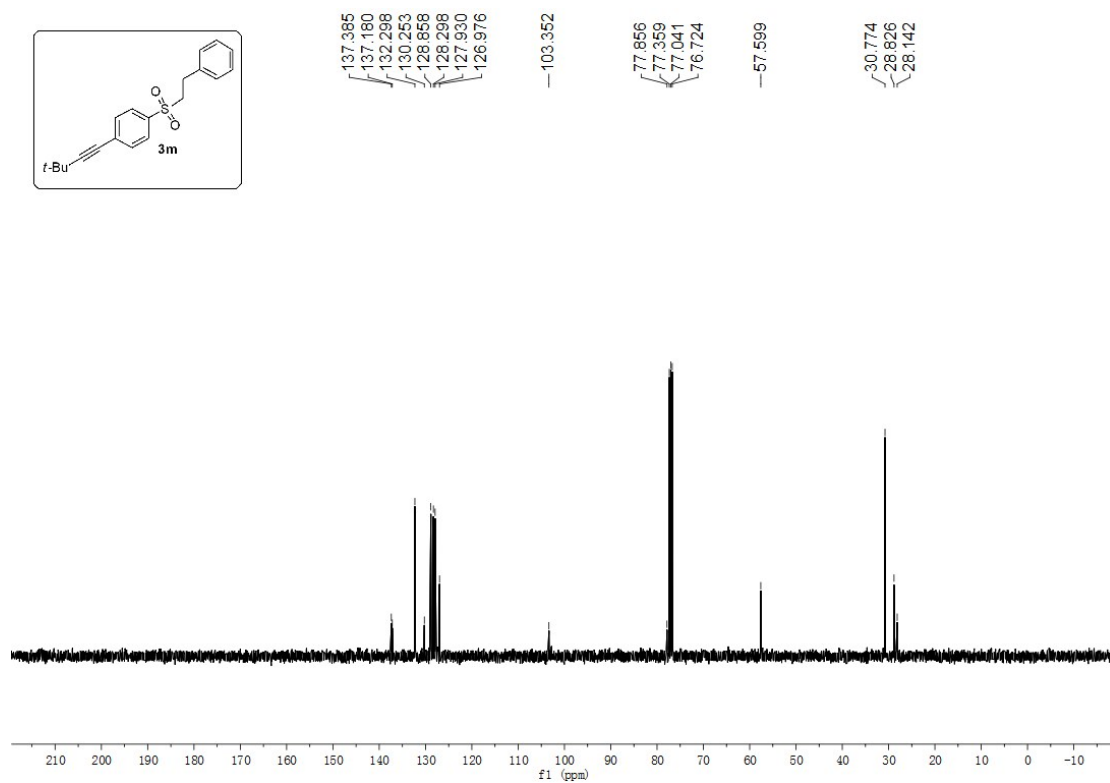

Figure 26. <sup>13</sup>C NMR spectra of **3m**

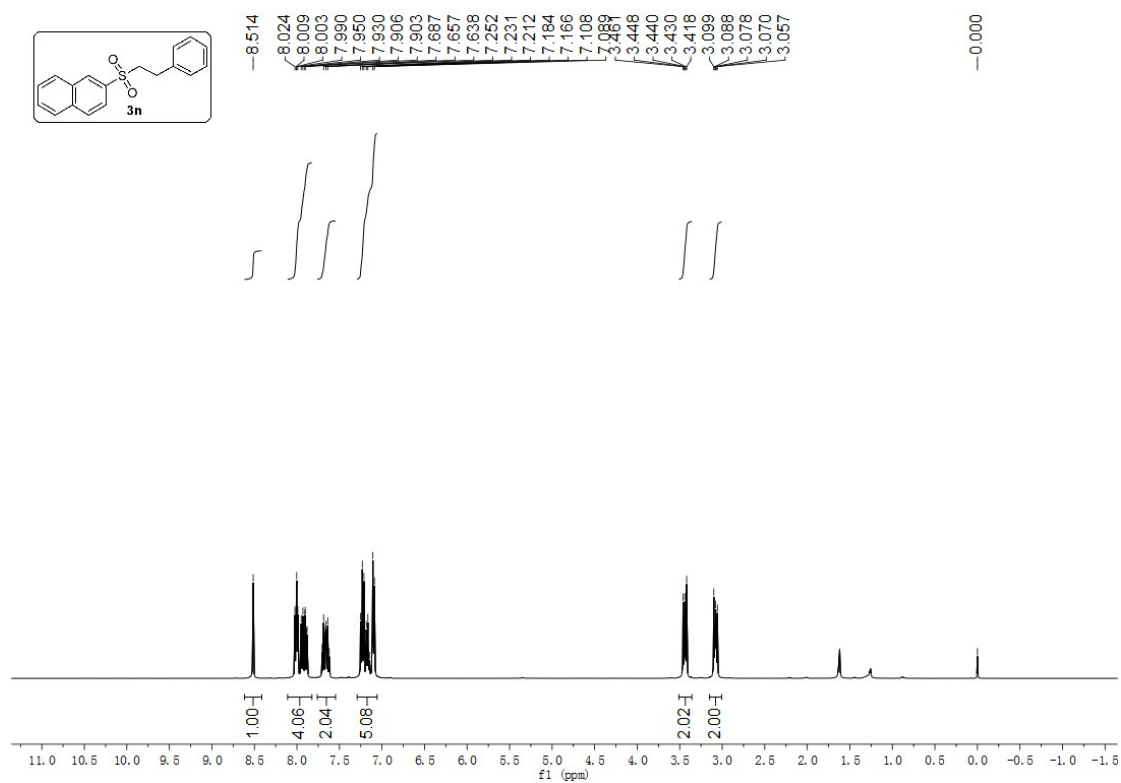

Figure 27. <sup>1</sup>H NMR spectra of **3n**

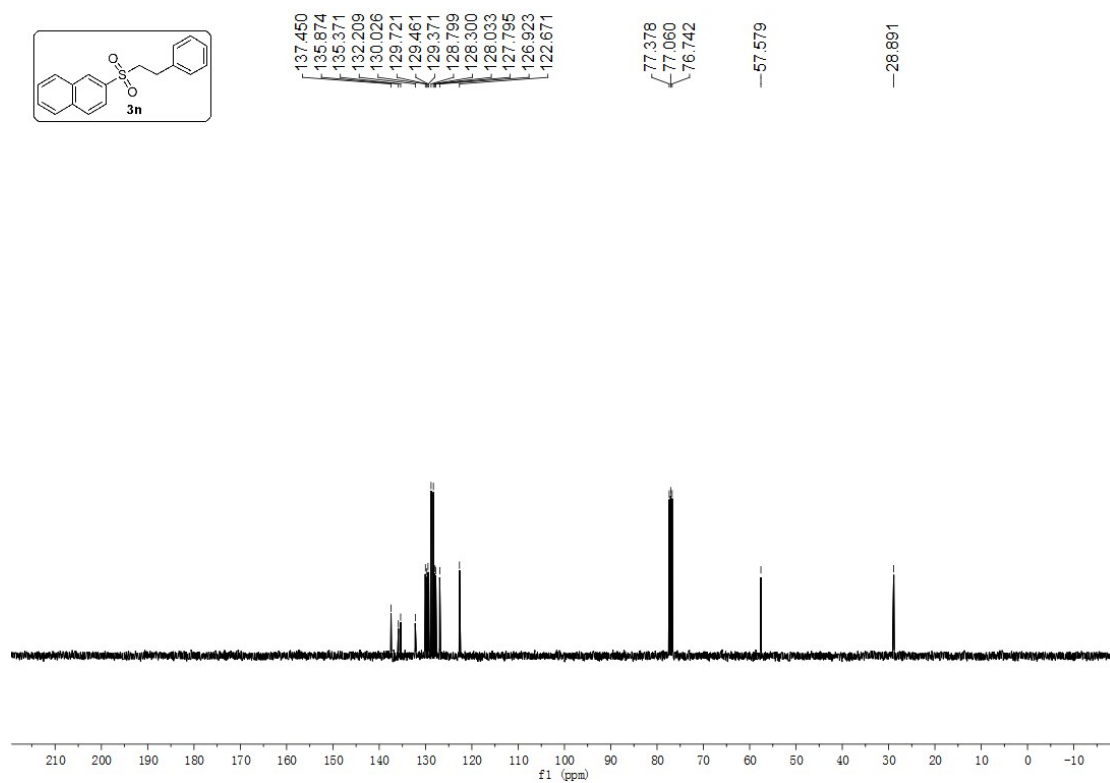

Figure 28. <sup>13</sup>C NMR spectra of **3n**

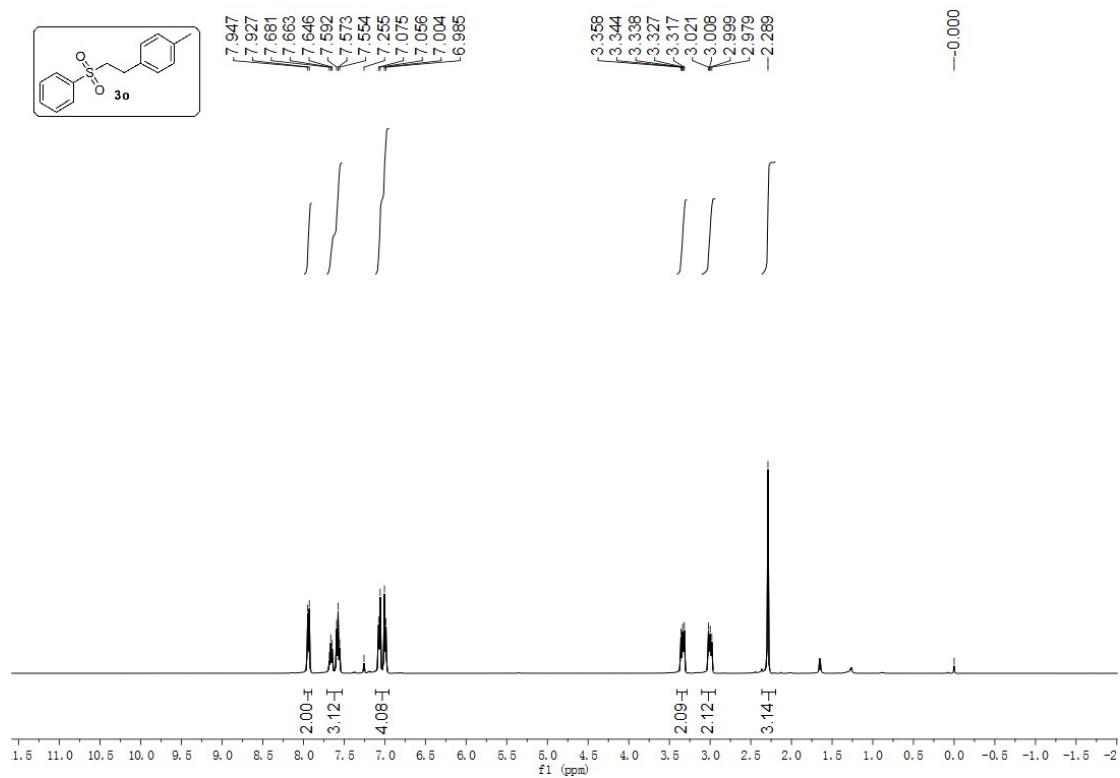

Figure 29. <sup>1</sup>H NMR spectra of **3o**

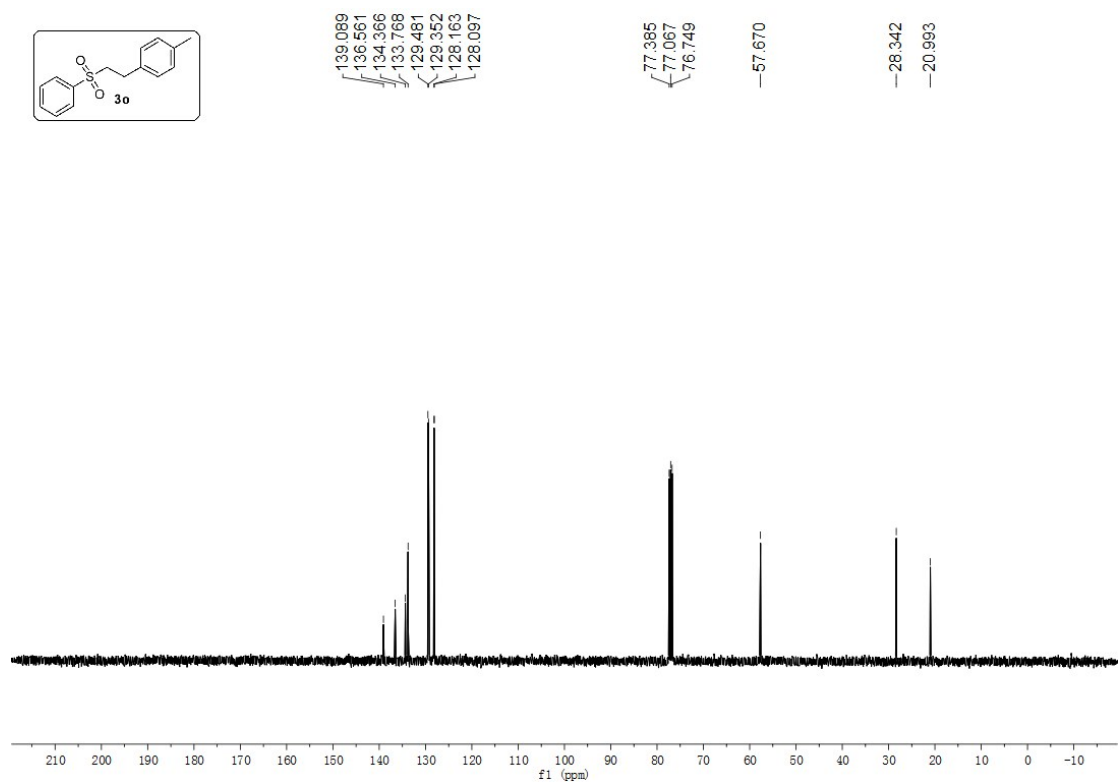

Figure 30. <sup>13</sup>C NMR spectra of **3o**

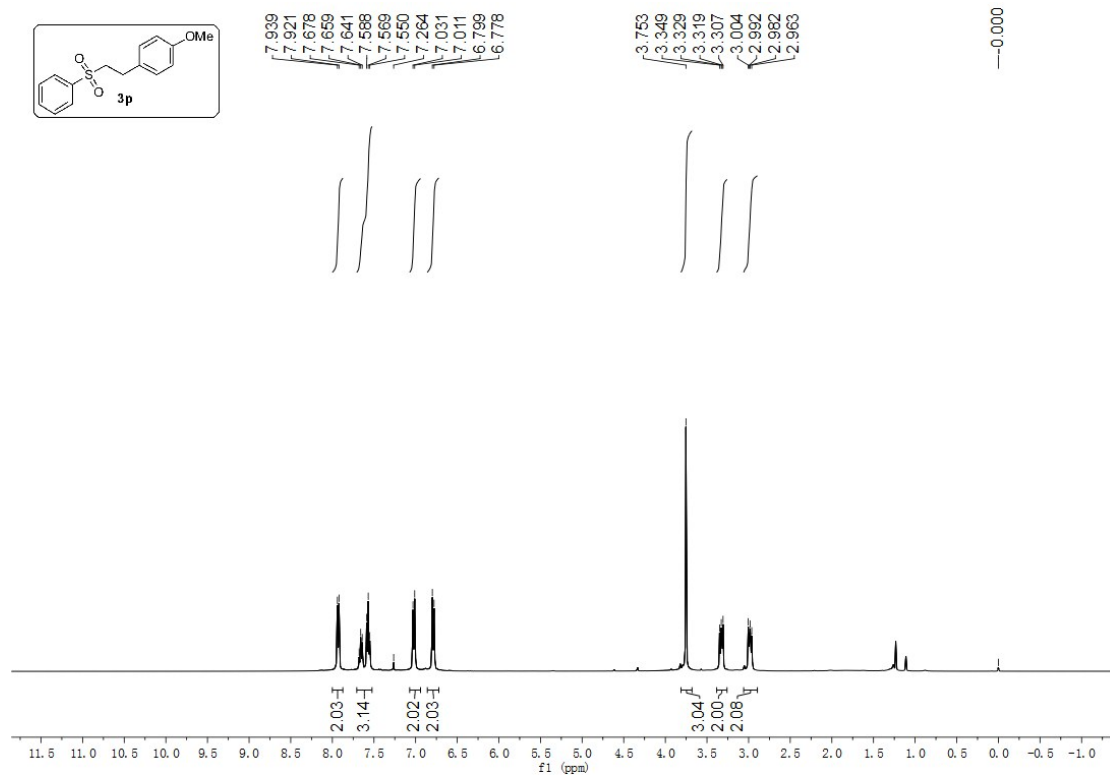

Figure 31. <sup>1</sup>H NMR spectra of **3p**

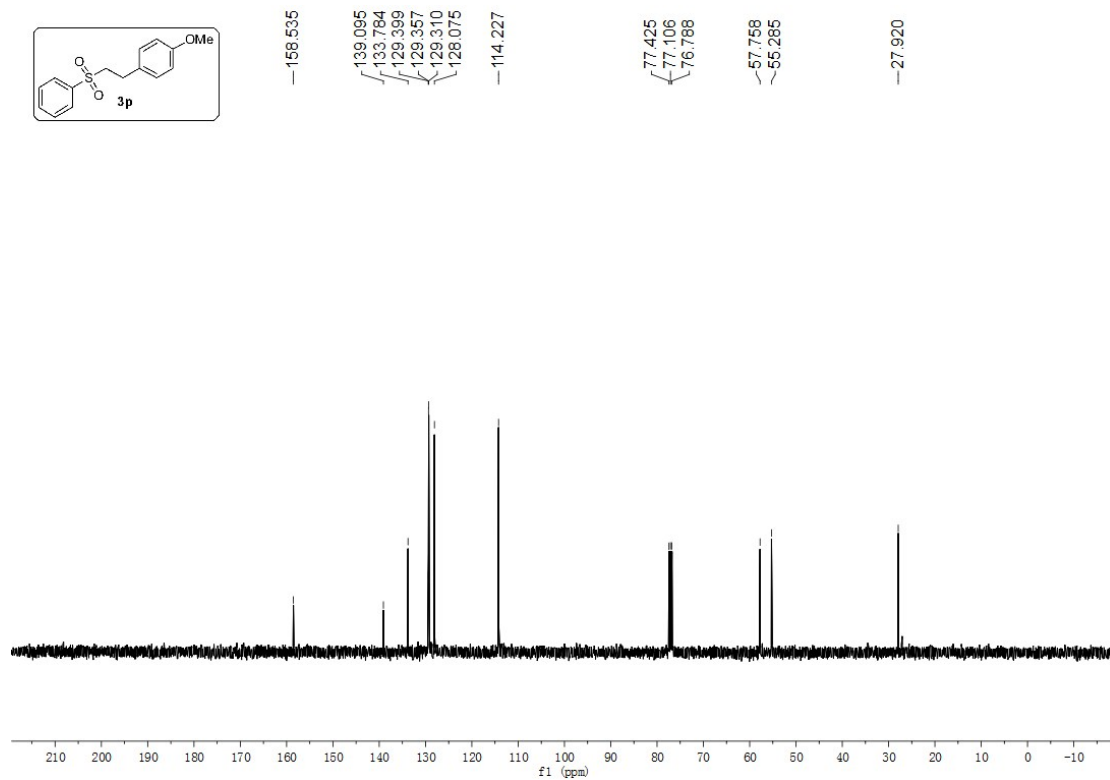

Figure 32. <sup>13</sup>C NMR spectra of **3p**

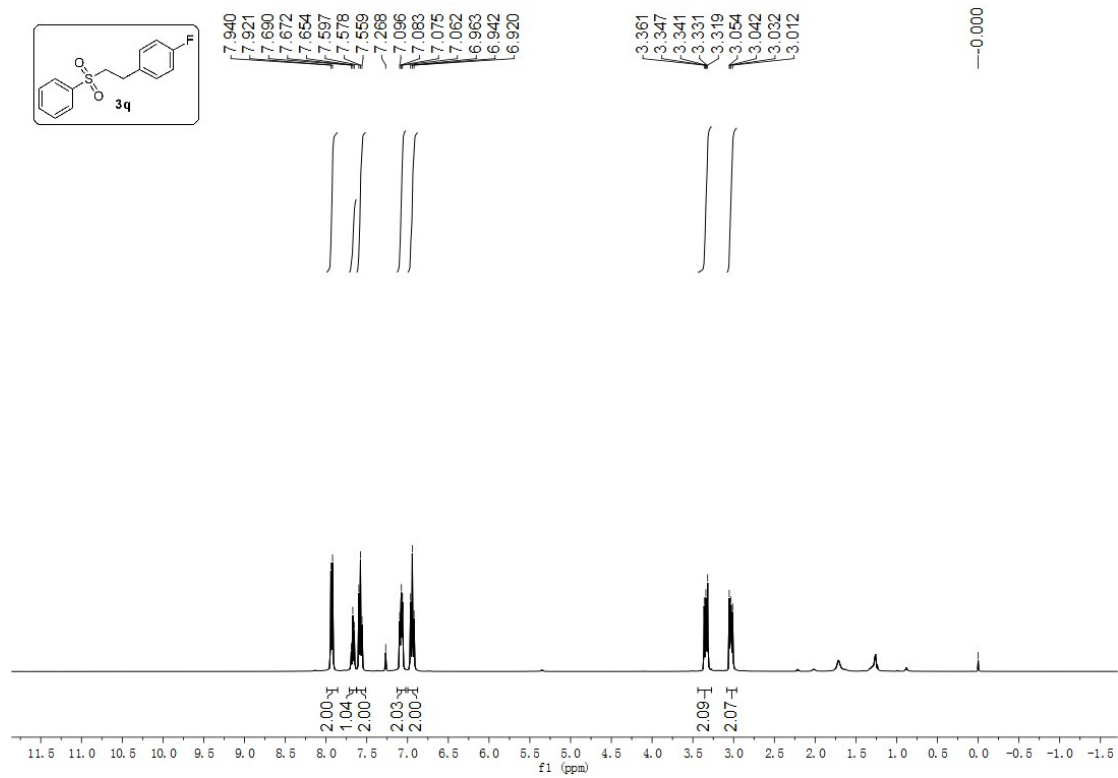

Figure 33. <sup>1</sup>H NMR spectra of **3q**

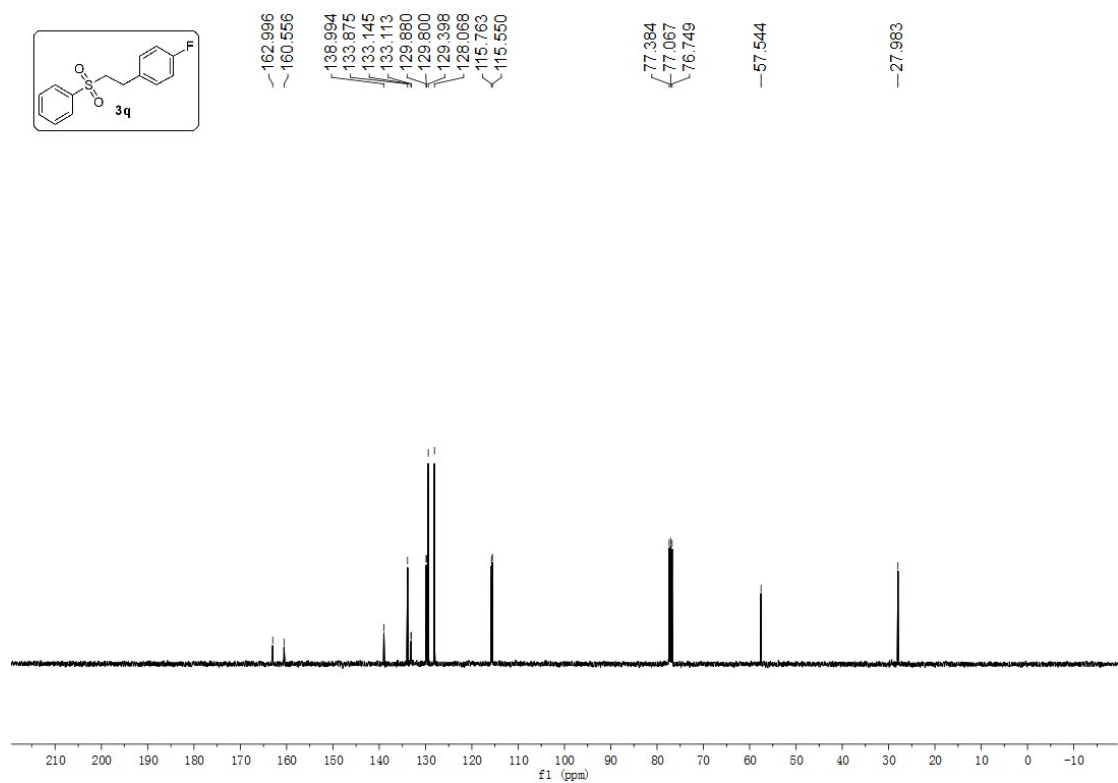

Figure 34. <sup>13</sup>C NMR spectra of **3q**

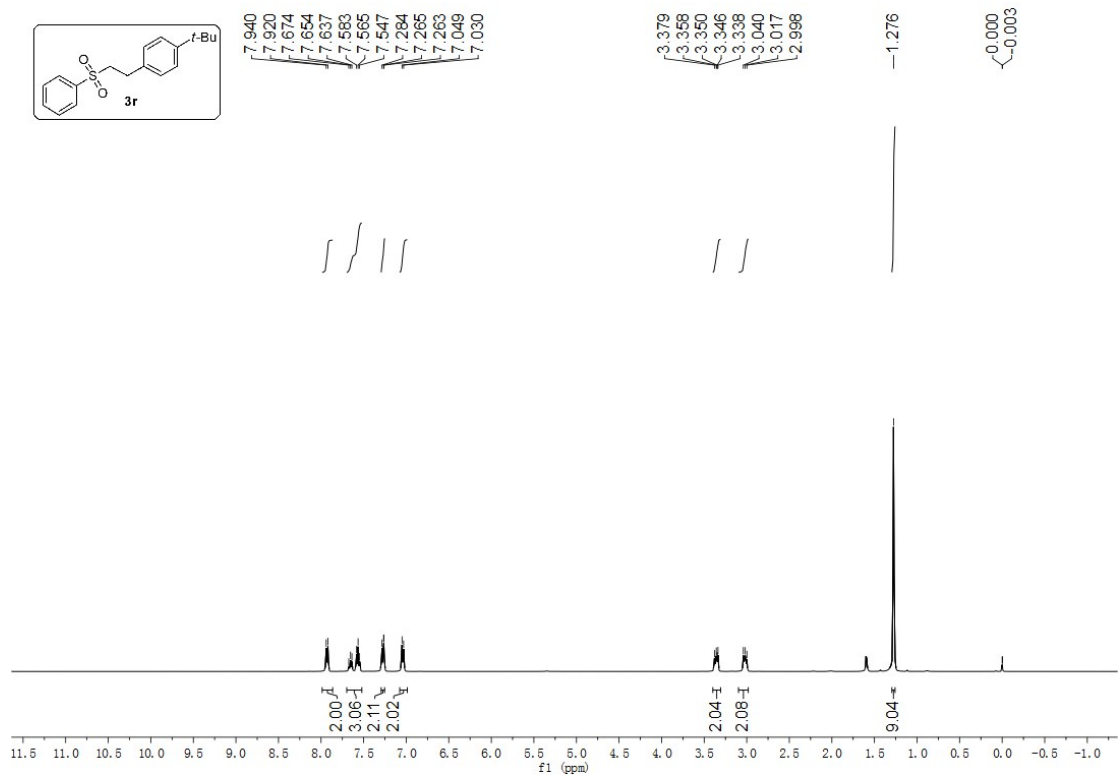

Figure 35. <sup>1</sup>H NMR spectra of **3r**

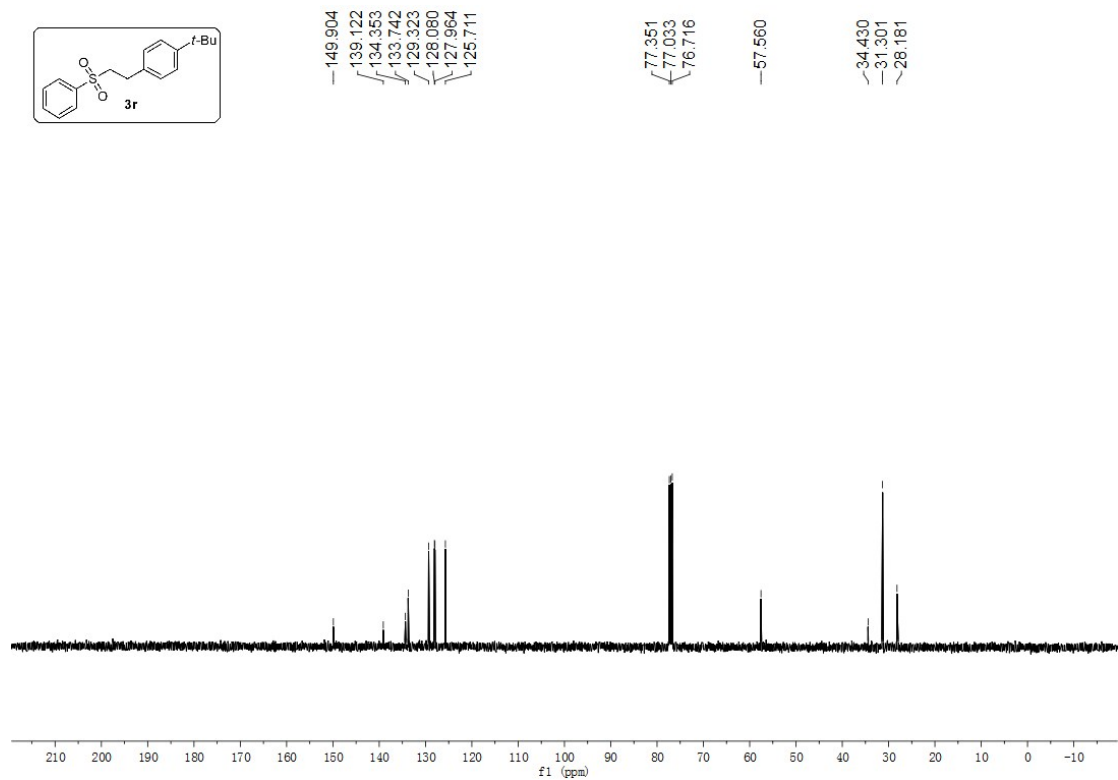

Figure 36. <sup>13</sup>C NMR spectra of **3r**

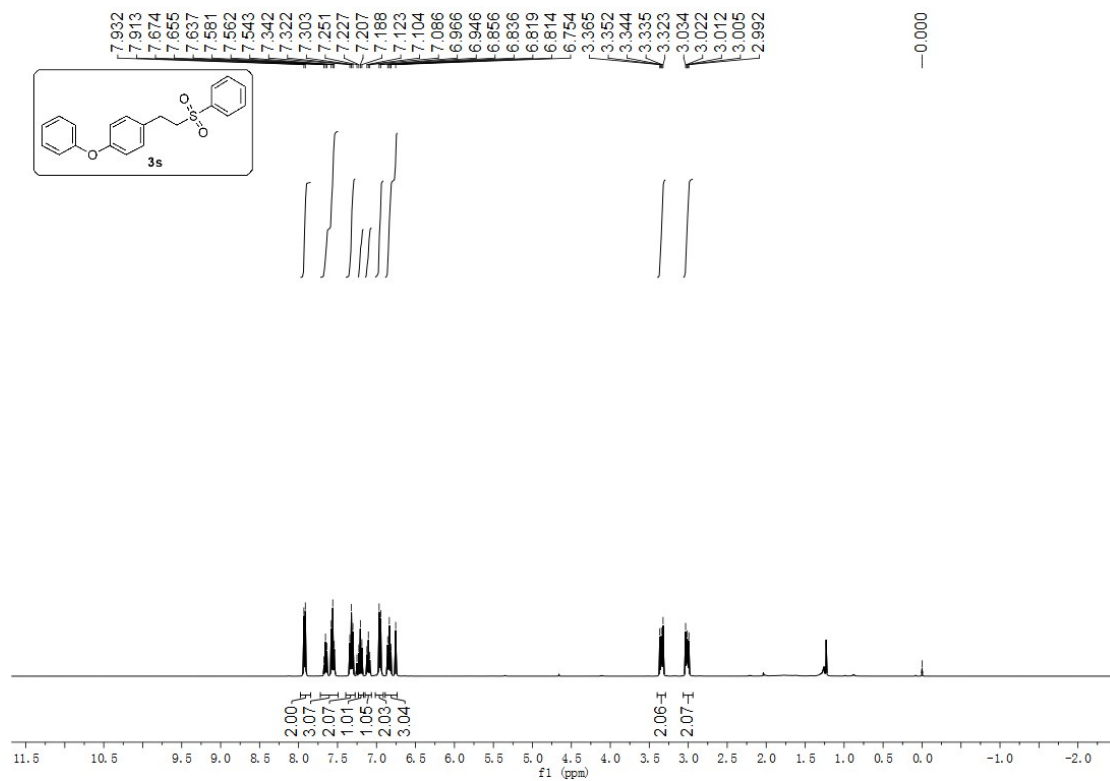

Figure 37.  $^1\text{H}$  NMR spectra of **3s**

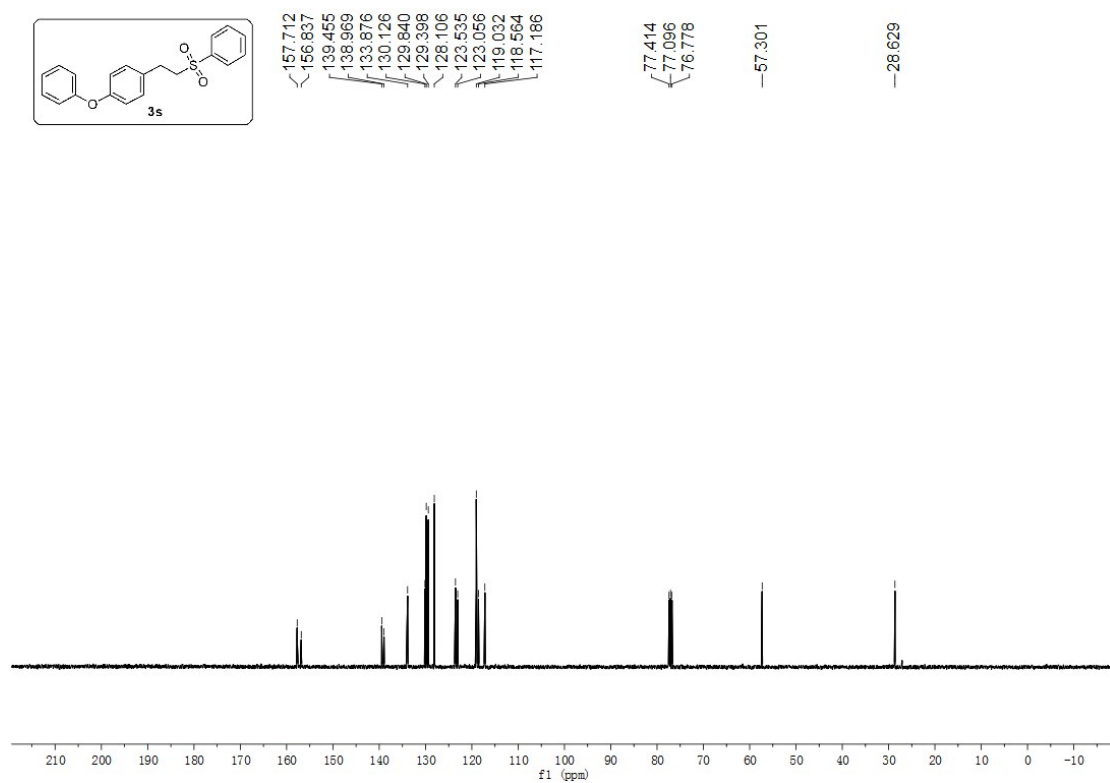

Figure 38.  $^{13}\text{C}$  NMR spectra of **3s**

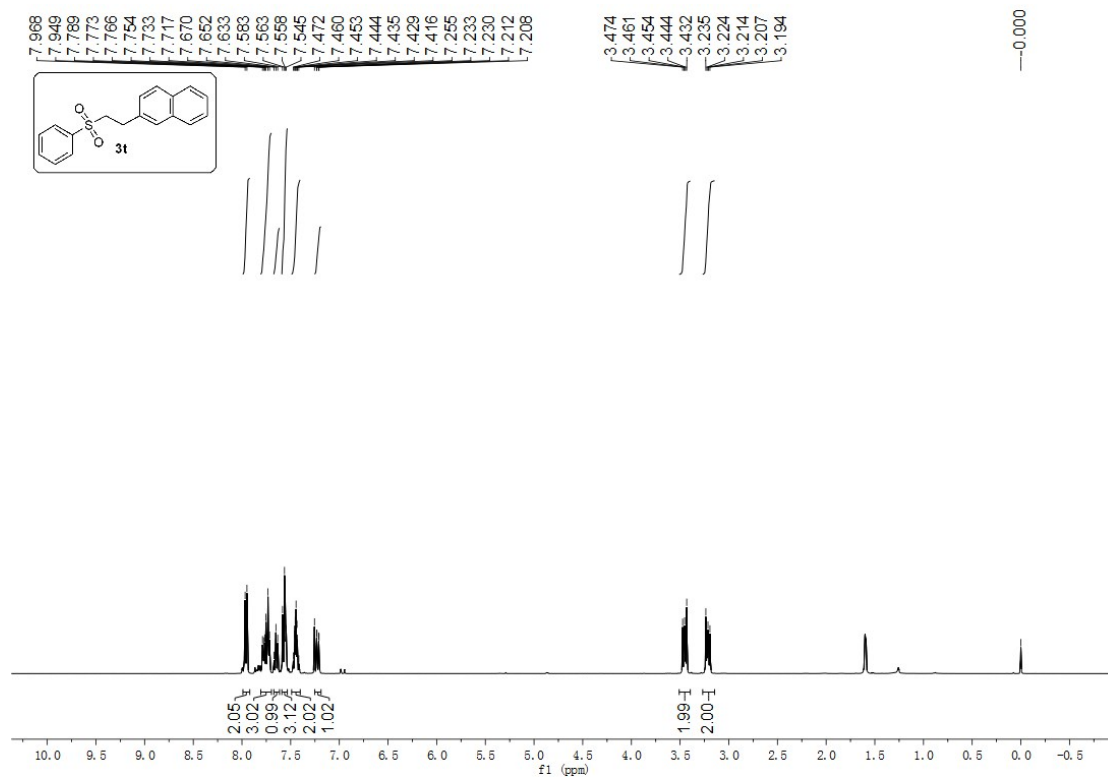

Figure 39. <sup>1</sup>H NMR spectra of **3t**

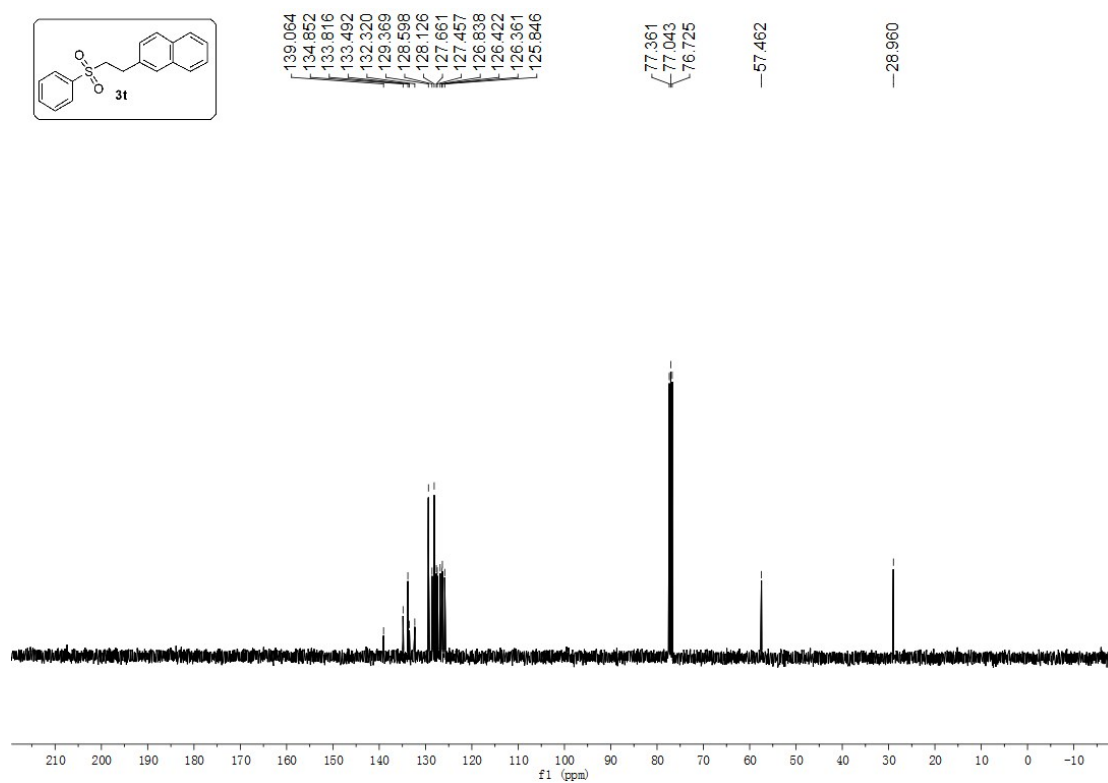

Figure 40. <sup>13</sup>C NMR spectra of **3t**



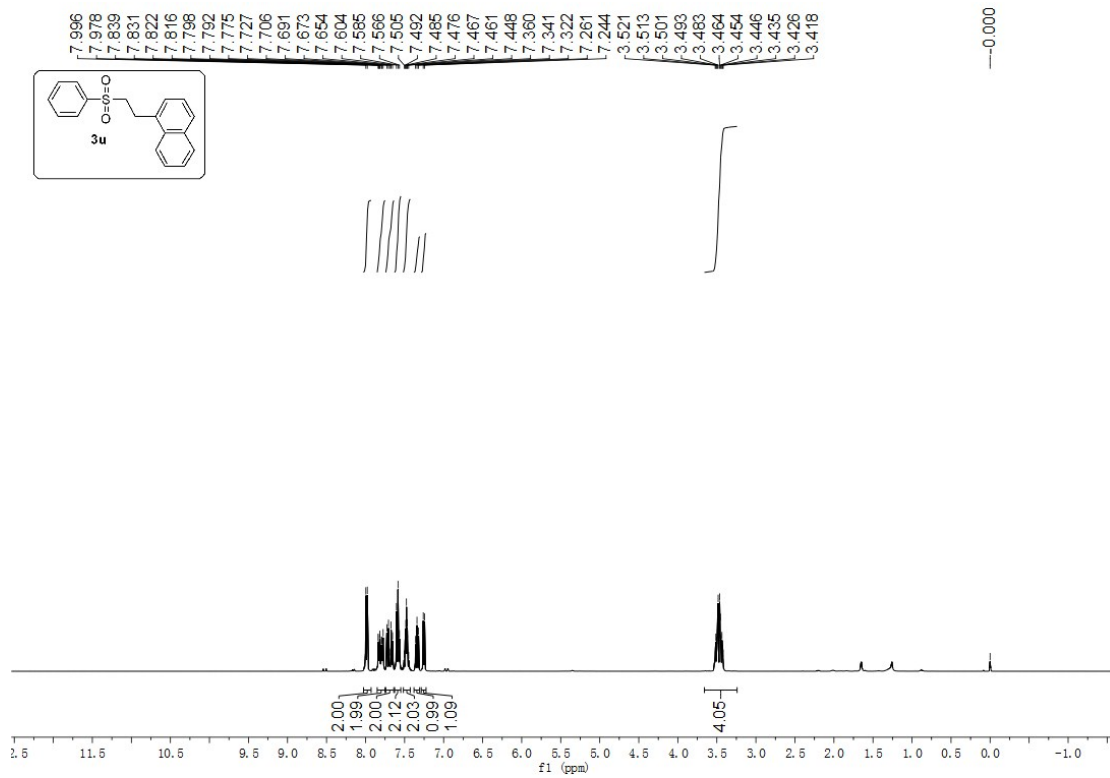

Figure 41. <sup>1</sup>H NMR spectra of **3u**

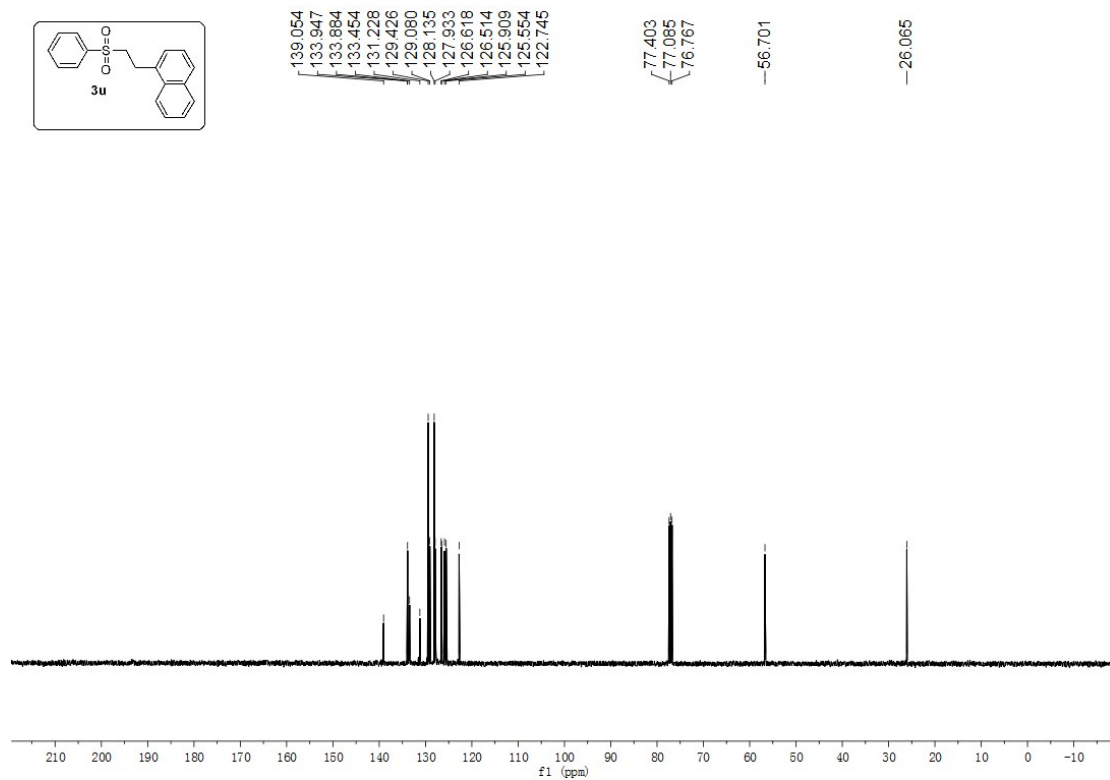

Figure 42. <sup>13</sup>C NMR spectra of **3u**

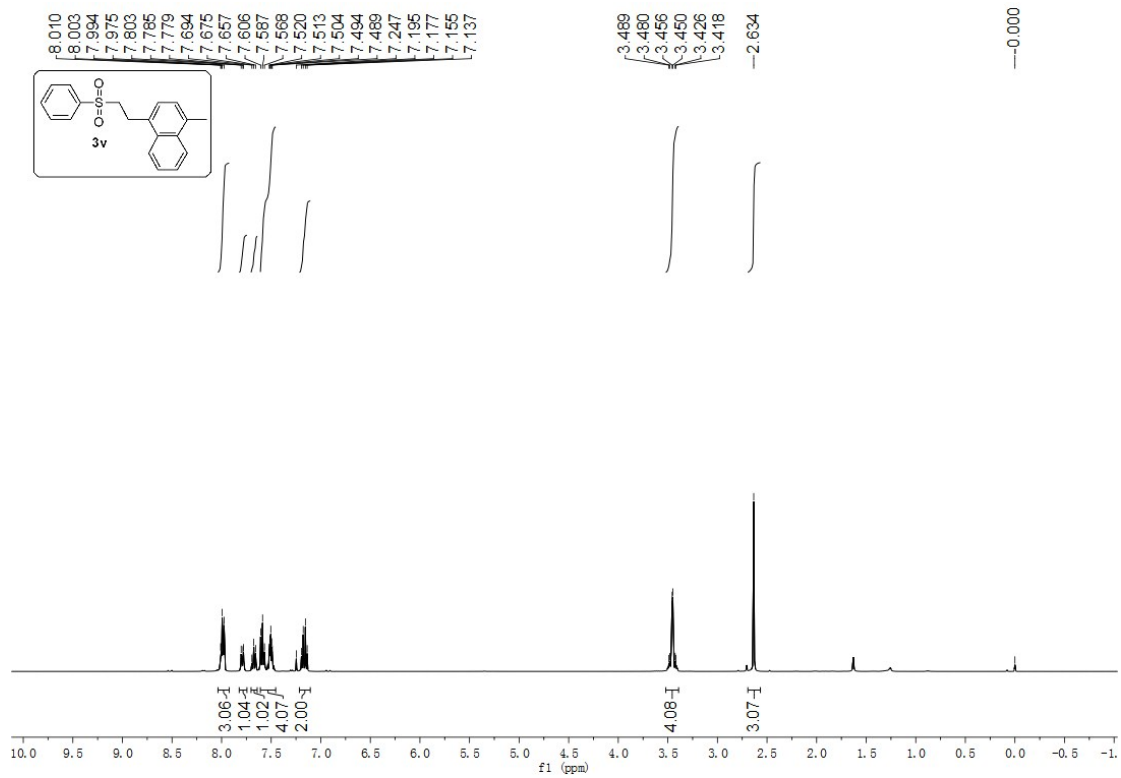

Figure 43. <sup>1</sup>H NMR spectra of **3v**

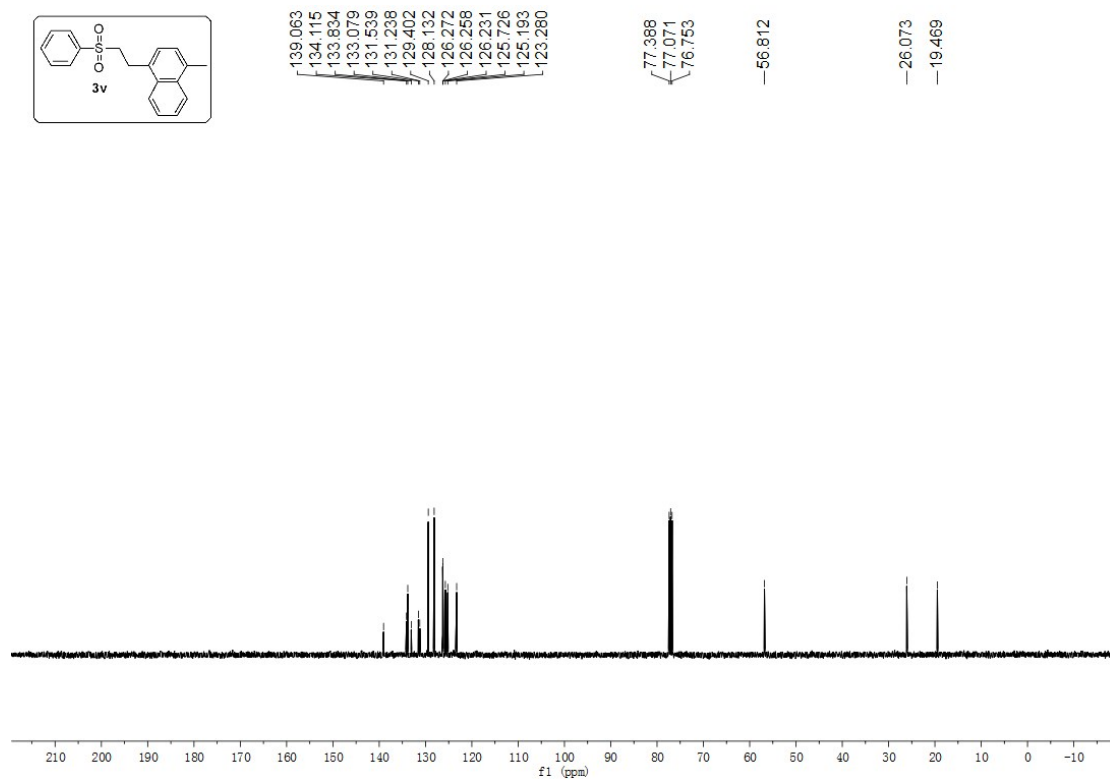

Figure 44. <sup>13</sup>C NMR spectra of **3v**

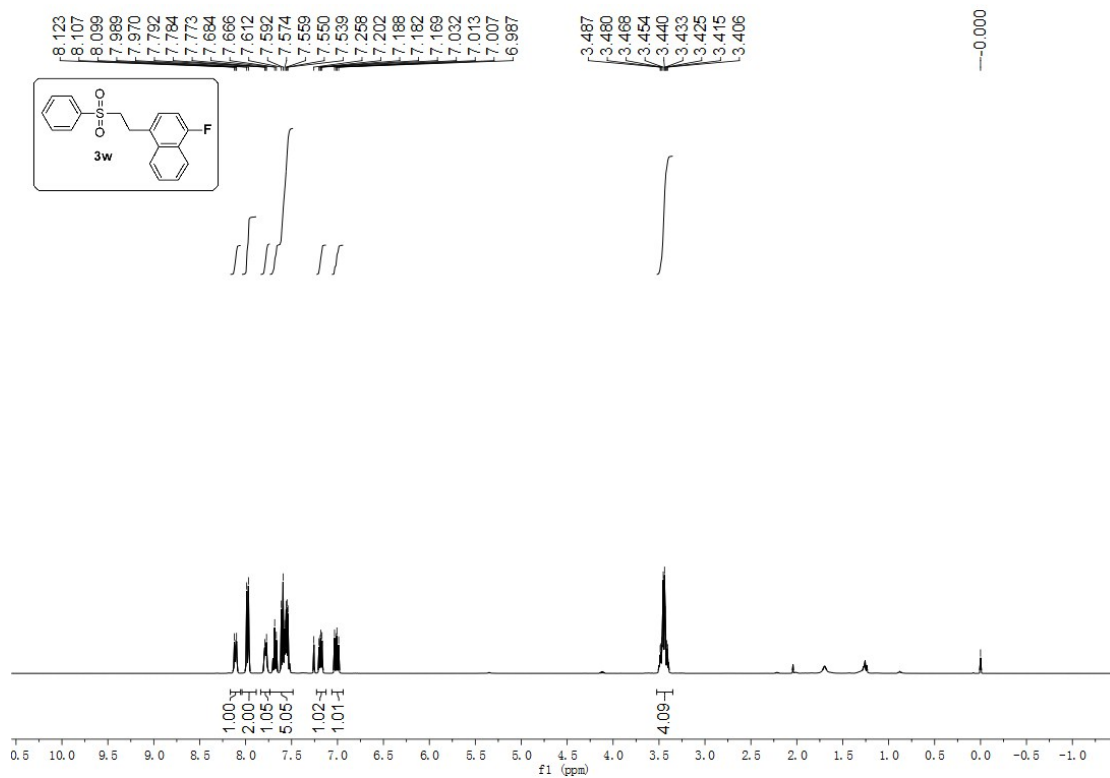

Figure 45. <sup>1</sup>H NMR spectra of **3w**

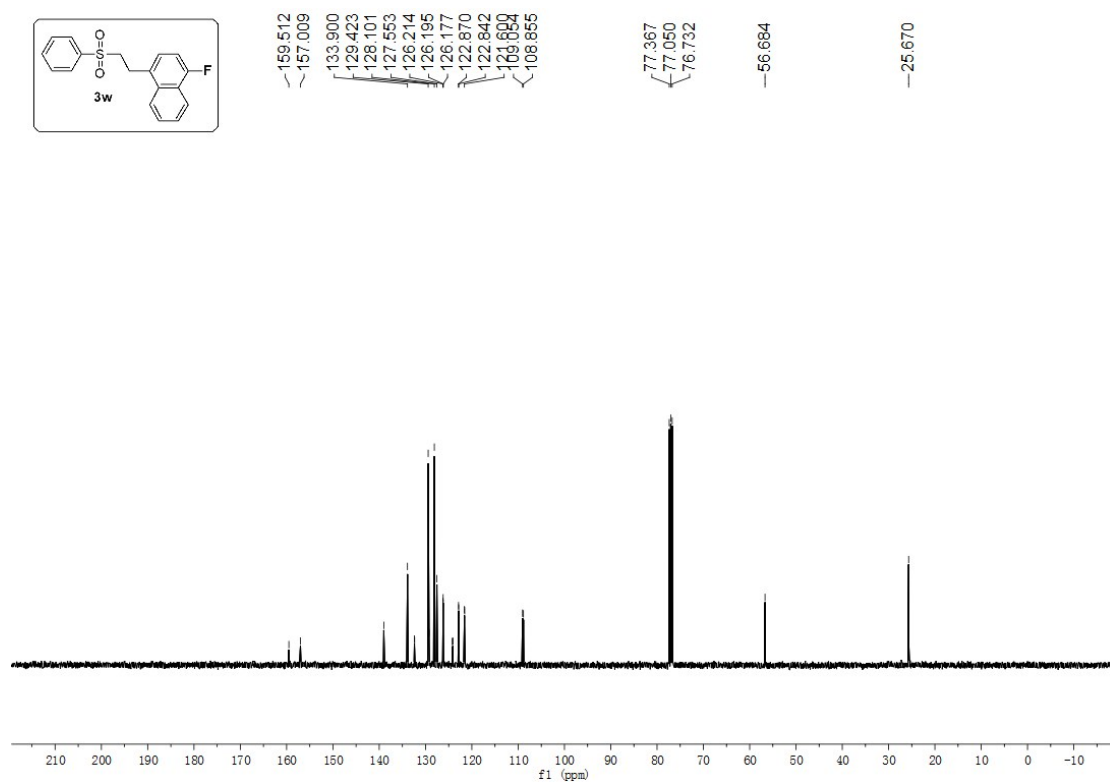

Figure 46. <sup>13</sup>C NMR spectra of **3w**

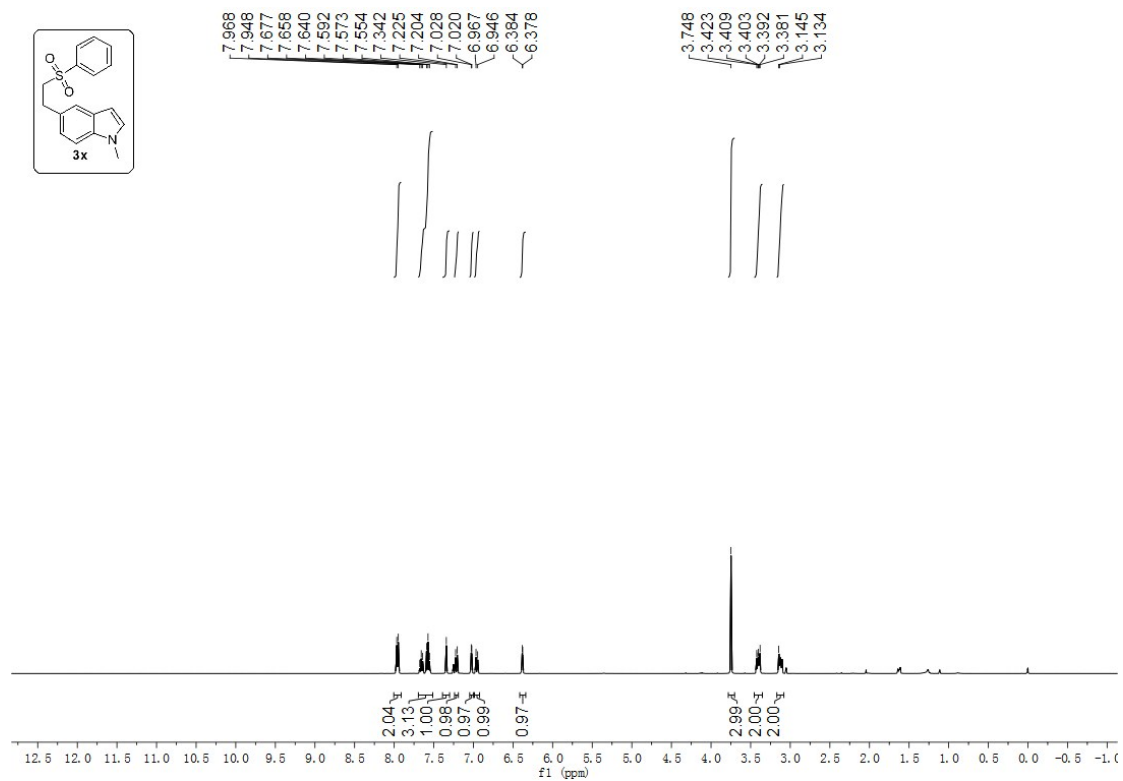

Figure 47. <sup>1</sup>H NMR spectra of **3x**

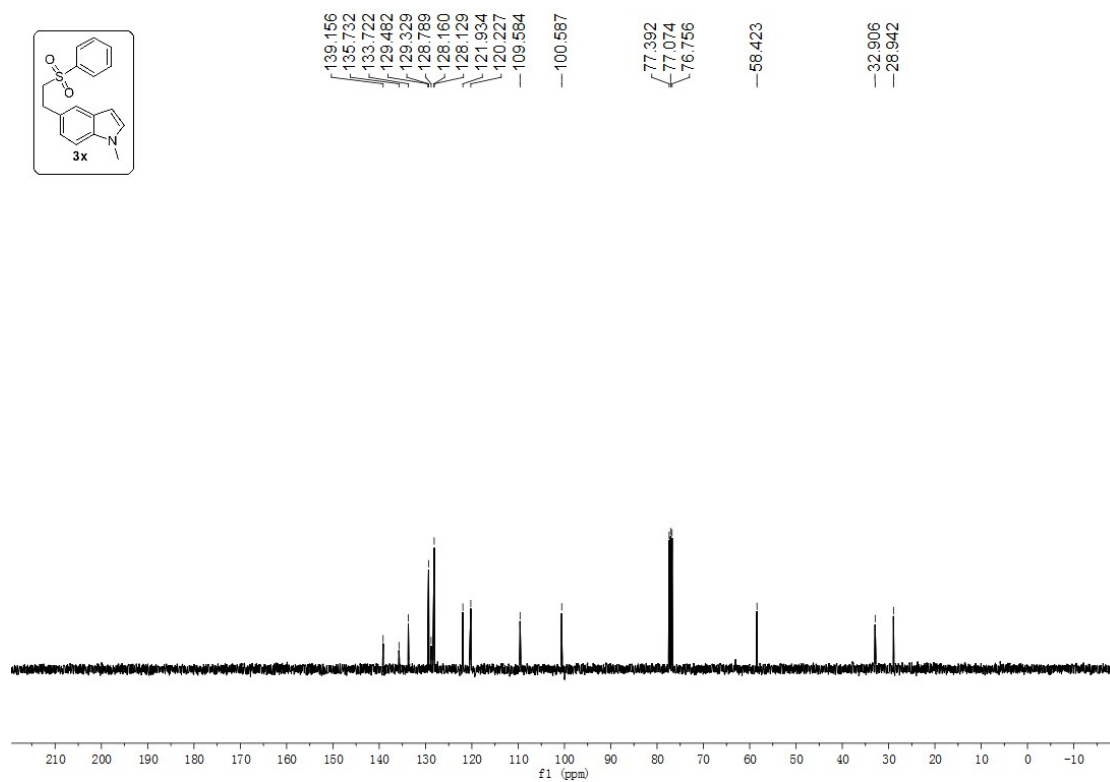

Figure 48. <sup>13</sup>C NMR spectra of **3x**

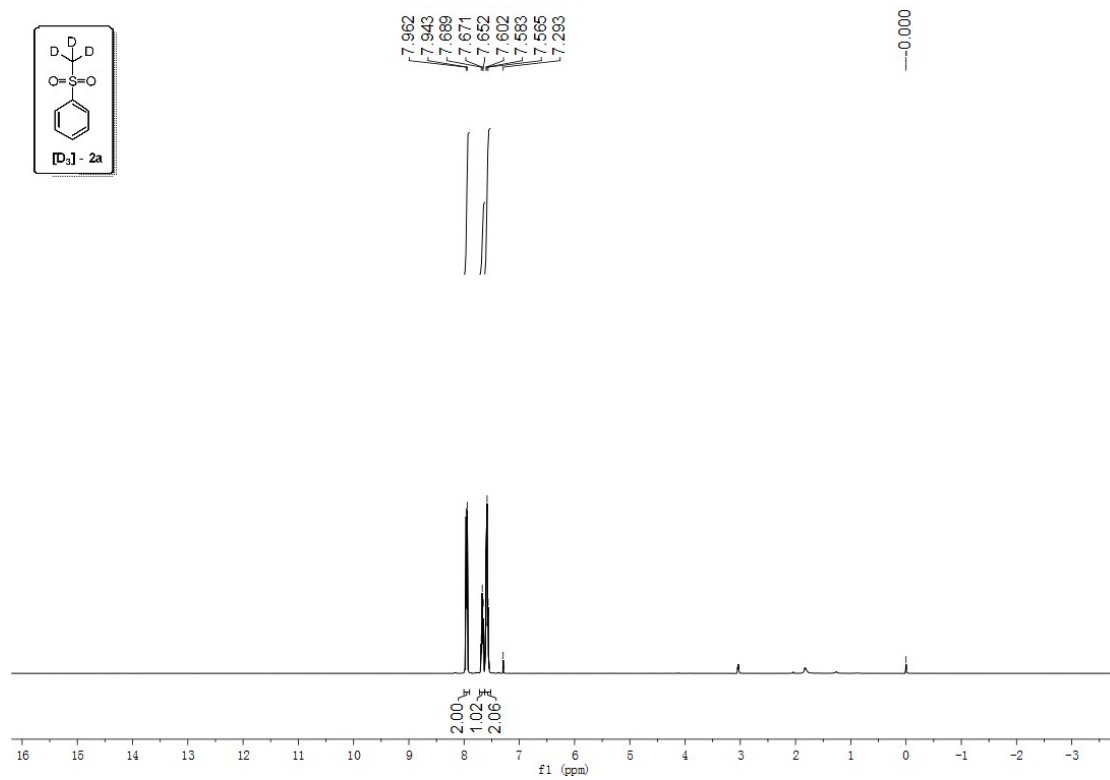

Figure 49.  $^1H$  NMR spectra of  $[D_3]-2a$
